# Supplementary material for: High dietary zinc feeding promotes persistence of multi-resistant E. coli in the swine gut
Source: PLoS One. 2018 Jan 26;13(1):e0191660. doi: 10.1371/journal.pone.0191660 (PMC5786291; doi:10.1371/journal.pone.0191660)
Supplement: S2 Table — (XLSX) [file pone.0191660.s002.xlsx]

## Sheet: legend
Header	Description
isolate	isolate identification (pig identification - date of isolation, sample abbreviation (K= feces; D= digesta; M= mucosa) isolate number
feeding group	diets with two different zinc oxide concentrations were fed 1= control group (72 mg zinc/kg diet); 2= zinc group (2103 mg zinc/kg diet)
sample	three different sample types were investigated 1= feces; 2= digesta; 3=mucosa
usage	randomly chosen isolates were two times sub-cultured on CHROMagar Orientation plates for a confirmation of the species, only colonies with a E. coli typical dark pink to reddish morphology were used for the resistance screening 1= colonies were used for the resistance screening; 0= colonies were not used for the resistance screening
time point	three different time points were investigates 1= 24 days of age; 2= 38 days of age; 3= 52 days of age
ampicillin	isolates were sub-cultured on LB agar plates containing ampicillin 32 µg/ml 1= resistant isolates which grew well on the plate, 0= sensitive isolates which did not grew on the plate
streptomycin	isolates were sub-cultured on LB agar plates containing streptomycin 64 µg/ml 1= resistant isolates which grew well on the plate, 0= sensitive isolates which did not grew on the plate
kanamycin	isolates were sub-cultured on LB agar plates containing kanamycin 64 µg/ml 1= resistant isolates which grew well on the plate, 0= sensitive isolates which did not grew on the plate
sulfamethoxazole- trimethoprim	isolates were sub-cultured on LB agar plates containing sulfamethoxazole-trimethoprim 76 µg/ml / 4 µg/ml 1= resistant isolates which grew well on the plate, 0= sensitive isolates which did not grew on the plate
tetracycline	isolates were sub-cultured on LB agar plates containing tetracycline 16 µg/ml 1= resistant isolates which grew well on the plate, 0= sensitive isolates which did not grew on the plate
enrofloxacin	isolates were sub-cultured on LB agar plates containing enrofloxacin 2 µg/ml 1= resistant isolates which grew well on the plate, 0= sensitive isolates which did not grew on the plate
number of resistances	number of the detected resistances
multi- resistance	Isolates were defined as multi-resistant when they were resistant against at least antimicrobial substances of three different antimicrobial classes 1= multi-resistant isolates, 0= not multi-resistant isolates
resistance pattern	according to the resistance screening the resistance pattern for the isolates were assigned, pattern are number coded 1-resistance against ampicillin, 2-against streptomycin, 3-against kanamycin, 4-against sulfamethoxazole-trimethoprim, 5-against tetracycline, 6-against enrofloxacin

## Sheet: data
isolat	feeding group	sample	usage	time point	ampicillin	streptomycin	kanamycin	sulfamethoxazole- trimethoprim	tetracycline	enrofloxacin	number of resistances	multi- resistance	resistance pattern
18/1 - 4.3. K1	1	1	1	1	1	1	0	1	1	0	4	1	1245
18/1 - 4.3. K2	1	1	1	1	1	1	0	1	1	0	4	1	1245
18/1 - 4.3. K3	1	1	1	1	1	1	0	1	1	0	4	1	1245
18/1 - 4.3. K4	1	1	1	1	1	1	0	1	1	0	4	1	1245
18/1 - 4.3. K5	1	1	1	1	1	1	0	1	1	0	4	1	1245
18/1 - 4.3. K6	1	1	1	1	1	1	0	1	1	0	4	1	1245
18/1 - 4.3. K7	1	1	1	1	1	1	0	1	1	0	4	1	1245
18/1 - 4.3. K8	1	1	1	1	1	1	0	1	1	0	4	1	1245
18/1 - 4.3. K9	1	1	1	1	1	1	0	1	1	0	4	1	1245
18/1 - 4.3. K10	1	1	1	1	1	1	0	1	1	0	4	1	1245
18/1 - 4.3. K11	1	1	1	1	0	0	0	0	0	0	0	0
18/1 - 4.3. K12	1	1	1	1	0	1	0	0	0	0	1	0	2
18/1 - 4.3. K13	1	1	1	1	0	0	0	0	0	0	0	0
18/1 - 4.3. K14	1	1	1	1	0	0	0	0	0	0	0	0
18/1 - 4.3. K15	1	1	1	1	0	1	0	0	0	0	1	0	2
18/1 - 4.3. K16	1	1	1	1	0	0	0	0	0	0	0	0
18/1 - 4.3. K17	1	1	1	1	0	0	0	0	0	0	0	0
18/1 - 4.3. K18	1	1	1	1	0	0	0	0	0	0	0	0
18/1 - 4.3. K19	1	1	1	1	0	1	0	0	0	0	1	0	2
18/1 - 4.3. K20	1	1	1	1	0	1	0	0	0	0	1	0	2
18/1 - 4.3. K21	1	1	1	1	0	0	0	0	0	0	0	0
18/1 - 4.3. K22	1	1	1	1	0	1	0	0	0	0	1	0	2
20/1 - 4.3. K1	1	1	1	1	1	1	0	1	1	0	4	1	1245
20/1 - 4.3. K2	1	1	1	1	1	1	0	1	1	0	4	1	1245
20/1 - 4.3. K3	1	1	1	1	0	1	0	0	1	0	2	0	25
20/1 - 4.3. K4	1	1	1	1	0	0	0	0	0	1	1	0	6
20/1 - 4.3. K5	1	1	1	1	1	1	0	1	1	0	4	1	1245
20/1 - 4.3. K6	1	1	1	1	0	1	0	0	1	0	2	0	25
20/1 - 4.3. K7	1	1	1	1	1	1	0	1	1	0	4	1	1245
20/1 - 4.3. K8	1	1	1	1	0	1	0	1	0	0	2	0	24
20/1 - 4.3. K9	1	1	1	1	0	0	0	0	0	1	1	0	6
20/1 - 4.3. K10	1	1	1	1	0	0	0	0	0	1	1	0	6
20/1 - 4.3. K11	1	1	1	1	0	1	0	0	0	0	1	0	2
20/1 - 4.3. K12	1	1	1	1	0	0	0	0	0	0	0	0
20/1 - 4.3. K13	1	1	1	1	0	0	0	0	0	0	0	0
20/1 - 4.3. K14	1	1	1	1	0	1	0	0	0	0	1	0	2
20/1 - 4.3. K15	1	1	1	1	0	1	0	0	0	0	1	0	2
20/1 - 4.3. K16	1	1	1	1	0	1	0	0	0	0	1	0	2
20/1 - 4.3. K17	1	1	1	1	0	0	0	0	0	0	0	0
20/1 - 4.3. K18	1	1	1	1	0	1	0	0	0	0	1	0	2
20/1 - 4.3. K19	1	1	1	1	0	1	0	0	0	0	1	0	2
20/1 - 4.3. K20	1	1	1	1	0	1	0	0	0	0	1	0	2
20/1 - 4.3. K21	1	1	1	1	0	0	0	0	0	0	0	0
20/1 - 4.3. K22	1	1	1	1	0	1	0	0	0	0	1	0	2
20/1 - 4.3. K30	1	1	1	1	1	1	0	1	1	0	4	1	1245
23/1 - 4.3. K1	1	1	1	1	1	1	0	1	1	0	4	1	1245
23/1 - 4.3. K2	1	1	1	1	1	1	0	0	1	0	3	1	125
23/1 - 4.3. K3	1	1	1	1	0	0	0	0	0	1	1	0	6
23/1 - 4.3. K4	1	1	1	1	0	0	0	0	0	1	1	0	6
23/1 - 4.3. K5	1	1	1	1	0	1	0	1	0	0	2	0	24
23/1 - 4.3. K6	1	1	1	1	1	1	0	1	1	0	4	1	1245
23/1 - 4.3. K7	1	1	1	1	1	1	0	1	1	0	4	1	1245
23/1 - 4.3. K8	1	1	1	1	1	1	0	0	1	0	3	1	125
23/1 - 4.3. K9	1	1	1	1	0	0	0	0	0	1	1	0	6
23/1 - 4.3. K10	1	1	1	1	0	0	0	0	0	1	1	0	6
23/1 - 4.3. K11	1	1	1	1	0	0	0	0	0	0	0	0
23/1 - 4.3. K12	1	1	1	1	0	0	0	0	0	0	0	0
23/1 - 4.3. K13	1	1	1	1	0	0	0	0	0	0	0	0
23/1 - 4.3. K14	1	1	1	1	0	1	0	0	0	0	1	0	2
23/1 - 4.3. K15	1	1	1	1	0	1	0	0	0	0	1	0	2
23/1 - 4.3. K16	1	1	1	1	0	0	0	0	0	0	0	0
23/1 - 4.3. K17	1	1	1	1	0	0	0	0	0	0	0	0
23/1 - 4.3. K18	1	1	1	1	0	0	0	0	0	0	0	0
23/1 - 4.3. K19	1	1	1	1	0	1	0	0	0	0	1	0	2
23/1 - 4.3. K20	1	1	1	1	0	0	0	0	0	0	0	0
23/1 - 4.3. K21	1	1	1	1	0	0	0	0	0	0	0	0
23/1 - 4.3. K22	1	1	1	1	0	1	0	0	0	0	1	0	2
23/3 - 4.3. K1	1	1	1	1	1	1	0	0	1	0	3	1	125
23/3 - 4.3. K2	1	1	1	1	1	0	0	0	1	0	2	0	15
23/3 - 4.3. K3	1	1	1	1	1	1	0	1	1	0	4	1	1245
23/3 - 4.3. K4	1	1	1	1	0	1	0	1	0	0	2	0	24
23/3 - 4.3. K5	1	1	1	1	0	1	0	1	0	0	2	0	24
23/3 - 4.3. K6	1	1	1	1	0	1	0	1	0	0	2	0	24
23/3 - 4.3. K7	1	1	1	1	1	1	0	0	1	0	3	1	125
23/3 - 4.3. K8	1	1	1	1	0	1	0	0	1	0	2	0	25
23/3 - 4.3. K9	1	1	1	1	0	1	0	0	1	0	2	0	25
23/3 - 4.3. K10	1	1	1	1	0	1	0	0	1	0	2	0	25
23/3 - 4.3. K11	1	1	1	1	0	1	0	0	0	0	1	0	2
23/3 - 4.3. K12	1	1	1	1	0	1	0	0	0	0	1	0	2
23/3 - 4.3. K13	1	1	1	1	0	1	0	0	0	0	1	0	2
23/3 - 4.3. K14	1	1	1	1	0	0	0	0	0	0	0	0
23/3 - 4.3. K15	1	1	1	1	0	1	0	0	0	0	1	0	2
23/3 - 4.3. K16	1	1	1	1	0	0	0	0	0	0	0	0
23/3 - 4.3. K17	1	1	1	1	0	1	0	0	0	0	1	0	2
23/3 - 4.3. K18	1	1	1	1	0	0	0	0	0	0	0	0
23/3 - 4.3. K19	1	1	1	1	0	1	0	0	0	0	1	0	2
23/3 - 4.3. K20	1	1	1	1	0	0	0	0	0	0	0	0
23/3 - 4.3. K21	1	1	1	1	0	1	0	0	0	0	1	0	2
23/3 - 4.3. K22	1	1	1	1	0	1	0	0	0	0	1	0	2
23/5 - 4.3. K1	2	1	1	1	1	1	0	1	1	0	4	1	1245
23/5 - 4.3. K2	2	1	1	1	1	1	0	0	1	0	3	1	125
23/5 - 4.3. K3	2	1	1	1	0	1	0	0	0	0	1	0	2
23/5 - 4.3. K4	2	1	1	1	0	0	0	0	0	1	1	0	6
23/5 - 4.3. K5	2	1	1	1	0	0	0	0	0	1	1	0	6
23/5 - 4.3. K6	2	1	1	1	0	1	0	0	0	0	1	0	2
23/5 - 4.3. K7	2	1	1	1	1	1	0	1	1	0	4	1	1245
23/5 - 4.3. K8	2	1	1	1	0	0	0	0	0	1	1	0	6
23/5 - 4.3. K9	2	1	1	1	0	0	0	0	0	1	1	0	6
23/5 - 4.3. K10	2	1	1	1	1	1	0	0	1	0	3	1	125
23/5 - 4.3. K11	2	1	1	1	1	1	0	0	1	0	3	1	125
23/5 - 4.3. K12	2	1	1	1	0	1	0	0	0	0	1	0	2
23/5 - 4.3. K13	2	1	1	1	0	1	0	0	0	0	1	0	2
23/5 - 4.3. K14	2	1	1	1	0	1	0	0	0	0	1	0	2
23/5 - 4.3. K15	2	1	1	1	0	1	0	0	0	0	1	0	2
23/5 - 4.3. K16	2	1	1	1	0	0	0	0	0	0	0	0
23/5 - 4.3. K17	2	1	1	1	0	1	0	0	0	0	1	0	2
23/5 - 4.3. K18	2	1	1	1	0	0	0	0	0	0	0	0
23/5 - 4.3. K19	2	1	1	1	0	1	0	0	0	0	1	0	2
23/5 - 4.3. K20	2	1	1	1	0	1	0	0	0	0	1	0	2
23/5 - 4.3. K21	2	1	1	1	0	1	0	0	0	0	1	0	2
23/5 - 4.3. K22	2	1	1	1	0	1	0	0	0	0	1	0	2
23/4 - 4.3. K1	1	1	1	1	1	1	0	0	1	0	3	1	125
23/4 - 4.3. K2	1	1	1	1	1	0	0	0	1	0	2	0	15
23/4 - 4.3. K3	1	1	1	1	1	1	0	0	1	0	3	1	125
23/4 - 4.3. K4	1	1	1	1	1	1	0	0	1	0	3	1	125
23/4 - 4.3. K5	1	1	1	1	1	1	0	1	1	0	4	1	1245
23/4 - 4.3. K6	1	1	1	1	1	1	0	0	1	0	3	1	125
23/4 - 4.3. K7	1	1	1	1	1	1	0	0	1	0	3	1	125
23/4 - 4.3. K8	1	1	1	1	0	1	0	1	0	0	2	0	24
23/4 - 4.3. K9	1	1	1	1	1	1	0	1	1	0	4	1	1245
23/4 - 4.3. K10	1	1	1	1	0	1	0	1	0	0	2	0	24
23/4 - 4.3. K11	1	1	1	1	0	0	0	0	0	0	0	0
23/4 - 4.3. K12	1	1	1	1	0	0	0	0	0	0	0	0
23/4 - 4.3. K13	1	1	1	1	0	0	0	0	0	0	0	0
23/4 - 4.3. K14	1	1	1	1	0	0	0	0	0	0	0	0
23/4 - 4.3. K16	1	1	1	1	0	0	0	0	0	0	0	0
23/4 - 4.3. K17	1	1	1	1	0	0	0	0	0	0	0	0
23/4 - 4.3. K18	1	1	1	1	0	0	0	0	0	0	0	0
23/4 - 4.3. K19	1	1	1	1	0	0	0	0	0	0	0	0
23/4 - 4.3. K20	1	1	1	1	0	0	0	0	0	0	0	0
23/4 - 4.3. K21	1	1	1	1	0	0	0	0	0	0	0	0
23/4 - 4.3. K22	1	1	1	1	0	0	0	0	0	0	0	0
24/5 - 4.3. K1	1	1	1	1	1	1	0	1	1	0	4	1	1245
24/5 - 4.3. K2	1	1	1	1	1	1	0	0	1	0	3	1	125
24/5 - 4.3. K3	1	1	1	1	0	1	0	0	0	0	1	0	2
24/5 - 4.3. K4	1	1	1	1	0	1	0	1	0	0	2	0	24
24/5 - 4.3. K5	1	1	1	1	0	0	0	0	0	1	1	0	6
24/5 - 4.3. K6	1	1	1	1	0	0	0	0	0	1	1	0	6
24/5 - 4.3. K7	1	1	1	1	0	1	0	1	0	0	2	0	24
24/5 - 4.3. K8	1	1	1	1	0	1	0	1	1	0	3	1	245
24/5 - 4.3. K9	1	1	1	1	1	1	0	1	1	0	4	1	1245
24/5 - 4.3. K10	1	1	1	1	1	1	0	1	1	0	4	1	1245
24/5 - 4.3. K11	1	1	1	1	0	0	0	0	0	1	1	0	6
24/5 - 4.3. K12	1	1	1	1	0	0	0	0	0	1	1	0	6
24/5 - 4.3. K13	1	1	1	1	0	1	0	0	0	0	1	0	2
24/5 - 4.3. K14	1	1	1	1	0	0	0	0	0	0	0	0
24/5 - 4.3. K15	1	1	1	1	0	1	0	0	0	0	1	0	2
24/5 - 4.3. K16	1	1	1	1	0	1	0	0	0	0	1	0	2
24/5 - 4.3. K17	1	1	1	1	0	1	0	0	0	0	1	0	2
24/5 - 4.3. K18	1	1	1	1	0	1	0	0	0	0	1	0	2
24/5 - 4.3. K19	1	1	1	1	0	1	0	0	0	0	1	0	2
24/5 - 4.3. K20	1	1	1	1	0	1	0	0	0	0	1	0	2
24/5 - 4.3. K21	1	1	1	1	0	1	0	0	0	0	1	0	2
24/5 - 4.3. K22	1	1	1	1	0	1	0	0	0	0	1	0	2
22/2 - 4.3. K1	2	1	1	1	1	1	0	1	1	0	4	1	1245
22/2 - 4.3. K2	2	1	1	1	1	1	0	1	1	0	4	1	1245
22/2 - 4.3. K3	2	1	1	1	0	1	0	0	1	0	2	0	25
22/2 - 4.3. K4	2	1	1	1	0	1	0	1	0	0	2	0	24
22/2 - 4.3. K5	2	1	1	1	0	0	0	1	1	0	2	0	45
22/2 - 4.3. K6	2	1	1	1	1	1	0	1	1	0	4	1	1245
22/2 - 4.3. K7	2	1	1	1	0	1	0	1	1	0	3	1	245
22/2 - 4.3. K8	2	1	1	1	1	1	0	1	1	0	4	1	1245
22/2 - 4.3. K9	2	1	1	1	1	1	0	1	1	0	4	1	1245
22/2 - 4.3. K10	2	1	1	1	1	1	0	1	1	0	4	1	1245
22/2 - 4.3. K11	2	1	1	1	0	0	0	0	0	0	0	0
22/2 - 4.3. K12	2	1	1	1	0	1	0	0	0	0	1	0	2
22/2 - 4.3. K13	2	1	1	1	0	1	0	1	0	0	2	0	24
22/2 - 4.3. K14	2	1	1	1	0	1	0	0	0	0	1	0	2
22/2 - 4.3. K15	2	1	1	1	0	1	0	0	0	0	1	0	2
22/2 - 4.3. K16	2	1	1	1	0	1	0	0	0	0	1	0	2
22/2 - 4.3. K17	2	1	1	1	0	1	0	0	0	0	1	0	2
22/2 - 4.3. K18	2	1	1	1	0	1	0	0	0	0	1	0	2
22/2 - 4.3. K19	2	1	1	1	0	1	0	1	1	0	3	1	245
22/2 - 4.3. K20	2	1	1	1	1	1	0	1	1	0	4	1	1245
22/2 - 4.3. K21	2	1	1	1	0	1	0	0	0	0	1	0	2
22/2 - 4.3. K22	2	1	1	1	0	1	0	1	0	0	2	0	24
23/6 - 4.3. K1	2	1	1	1	1	1	0	0	1	0	3	1	125
23/6 - 4.3. K2	2	1	1	1	1	1	0	0	1	0	3	1	125
23/6 - 4.3. K3	2	1	1	1	1	1	0	1	1	0	4	1	1245
23/6 - 4.3. K4	2	1	1	1	0	0	0	0	0	1	1	0	6
23/6 - 4.3. K5	2	1	1	1	1	0	0	0	0	0	1	0	1
23/6 - 4.3. K6	2	1	1	1	1	1	0	1	1	0	4	1	1245
23/6 - 4.3. K7	2	1	1	1	1	1	0	1	1	0	4	1	1245
23/6 - 4.3. K8	2	1	1	1	1	1	0	0	1	0	3	1	125
23/6 - 4.3. K9	2	1	1	1	1	1	0	0	1	0	3	1	125
23/6 - 4.3. K10	2	1	1	1	0	0	0	0	0	1	1	0	6
23/6 - 4.3. K11	2	1	1	1	0	0	0	0	0	1	1	0	6
23/6 - 4.3. K12	2	1	1	1	1	1	0	0	1	0	3	1	125
23/6 - 4.3. K13	2	1	1	1	0	0	0	0	0	0	0	0
23/6 - 4.3. K14	2	1	1	1	0	0	0	0	0	0	0	0
23/6 - 4.3. K15	2	1	1	1	1	1	0	0	1	0	3	1	125
23/6 - 4.3. K16	2	1	1	1	0	0	0	0	0	0	0	0
23/6 - 4.3. K17	2	1	1	1	0	1	0	1	0	0	2	0	24
23/6 - 4.3. K18	2	1	1	1	0	0	0	0	0	0	0	0
23/6 - 4.3. K19	2	1	1	1	0	0	0	0	0	0	0	0
23/6 - 4.3. K20	2	1	1	1	0	0	0	0	0	0	0	0
23/6 - 4.3. K21	2	1	1	1	0	0	0	0	0	1	1	0	6
23/6 - 4.3. K22	2	1	1	1	0	1	0	0	1	0	2	0	25
23/6 - 4.3. K23	2	1	1	1	0	0	0	0	0	0	0	0
24/3 - 4.3. K1	2	1	1	1	1	1	0	1	1	0	4	1	1245
24/3 - 4.3. K2	2	1	1	1	1	1	0	1	1	0	4	1	1245
24/3 - 4.3. K3	2	1	1	1	1	1	0	1	1	0	4	1	1245
24/3 - 4.3. K4	2	1	1	1	1	1	0	1	1	0	4	1	1245
24/3 - 4.3. K5	2	1	1	1	1	0	0	0	0	0	1	0	1
24/3 - 4.3. K6	2	1	1	1	0	0	0	0	0	1	1	0	6
24/3 - 4.3. K7	2	1	1	1	0	1	0	0	1	0	2	0	25
24/3 - 4.3. K8	2	1	1	1	1	1	0	1	1	0	4	1	1245
24/3 - 4.3. K9	2	1	1	1	0	0	0	0	0	1	1	0	6
24/3 - 4.3. K10	2	1	1	1	0	0	0	0	0	1	1	0	6
24/3 - 4.3. K11	2	1	1	1	0	1	0	1	1	0	3	1	245
24/3 - 4.3. K12	2	1	1	1	0	1	0	1	0	0	2	0	24
24/3 - 4.3. K13	2	1	1	1	0	1	0	1	1	0	3	1	245
24/3 - 4.3. K14	2	1	1	1	0	1	0	0	0	0	1	0	2
24/3 - 4.3. K15	2	1	1	1	0	0	0	0	0	0	0	0
24/3 - 4.3. K16	2	1	1	1	0	1	0	0	0	0	1	0	2
24/3 - 4.3. K17	2	1	1	1	0	0	0	0	0	0	0	0
24/3 - 4.3. K18	2	1	1	1	0	1	0	1	0	0	2	0	24
24/3 - 4.3. K19	2	1	1	1	0	1	0	1	1	0	3	1	245
24/3 - 4.3. K20	2	1	1	1	0	1	0	0	1	0	2	0	25
24/3 - 4.3. K21	2	1	1	1	0	0	0	0	0	0	0	0
24/3 - 4.3. K22	2	1	1	1	0	0	0	0	0	0	0	0
27/4 - 5.3. K1	1	1	1	1	1	0	0	0	0	0	1	0	1
27/4 - 5.3. K2	1	1	1	1	1	1	0	0	1	0	3	1	125
27/4 - 5.3. K3	1	1	1	1	1	0	0	0	0	0	1	0	1
27/4 - 5.3. K4	1	1	1	1	0	0	0	0	0	1	1	0	6
27/4 - 5.3. K5	1	1	1	1	0	1	0	1	1	0	3	1	245
27/4 - 5.3. K6	1	1	1	1	0	1	0	1	0	0	2	0	24
27/4 - 5.3. K7	1	1	1	1	1	0	0	0	1	0	2	0	15
27/4 - 5.3. K8	1	1	1	1	0	0	0	0	1	0	1	0	5
27/4 - 5.3. K9	1	1	1	1	0	0	0	0	0	1	1	0	6
27/4 - 5.3. K10	1	1	1	1	0	0	0	0	0	1	1	0	6
27/4 - 5.3. K11	1	1	1	1	0	1	0	1	0	0	2	0	24
27/4 - 5.3. K12	1	1	1	1	0	0	0	0	0	0	0	0
27/4 - 5.3. K13	1	1	1	1	0	0	0	0	0	0	0	0
27/4 - 5.3. K14	1	1	1	1	0	1	0	1	0	0	2	0	24
27/4 - 5.3. K15	1	1	1	1	0	0	0	0	0	0	0	0
27/4 - 5.3. K16	1	1	1	1	0	0	0	0	0	0	0	0
27/4 - 5.3. K17	1	1	1	1	0	0	0	0	0	0	0	0
27/4 - 5.3. K18	1	1	1	1	0	0	0	0	0	0	0	0
27/4 - 5.3. K19	1	1	1	1	0	0	0	0	0	0	0	0
27/4 - 5.3. K20	1	1	1	1	0	0	0	0	0	0	0	0
27/4 - 5.3. K21	1	1	1	1	0	0	0	0	0	0	0	0
27/4 - 5.3. K22	1	1	1	1	0	0	0	0	0	0	0	0
18/4 - 5.3. K1	1	1	1	1	1	1	0	1	1	0	4	1	1245
18/4 - 5.3. K2	1	1	1	1	1	1	0	1	1	0	4	1	1245
18/4 - 5.3. K3	1	1	1	1	1	1	0	1	1	0	4	1	1245
18/4 - 5.3. K4	1	1	0	1
18/4 - 5.3. K5	1	1	1	1	1	1	0	1	1	0	4	1	1245
18/4 - 5.3. K6	1	1	1	1	1	1	0	1	1	0	4	1	1245
18/4 - 5.3. K7	1	1	1	1	1	1	0	1	1	0	4	1	1245
18/4 - 5.3. K8	1	1	1	1	1	1	0	1	1	0	4	1	1245
18/4 - 5.3. K9	1	1	1	1	1	1	0	1	1	0	4	1	1245
18/4 - 5.3. K10	1	1	1	1	0	1	0	0	1	0	2	0	25
18/4 - 5.3. K11	1	1	1	1	0	0	0	0	0	0	0	0
18/4 - 5.3. K12	1	1	1	1	0	0	0	0	0	0	0	0
18/4 - 5.3. K13	1	1	1	1	0	1	0	0	0	0	1	0	2
18/4 - 5.3. K14	1	1	1	1	0	1	0	0	0	0	1	0	2
18/4 - 5.3. K15	1	1	1	1	0	0	0	0	0	0	0	0
18/4 - 5.3. K16	1	1	1	1	0	1	0	0	0	0	1	0	2
18/4 - 5.3. K17	1	1	1	1	0	0	0	0	0	0	0	0
18/4 - 5.3. K18	1	1	1	1	0	1	0	0	0	0	1	0	2
18/4 - 5.3. K19	1	1	1	1	0	1	0	0	0	0	1	0	2
18/4 - 5.3. K20	1	1	1	1	0	1	0	0	0	0	1	0	2
18/4 - 5.3. K21	1	1	1	1	0	1	0	0	0	0	1	0	2
18/4 - 5.3. K22	1	1	1	1	0	0	0	0	0	0	0	0
20/12 - 5.3. K1	1	1	1	1	1	0	0	0	1	0	2	0	15
20/12 - 5.3. K2	1	1	1	1	1	1	0	0	1	0	3	1	125
20/12 - 5.3. K3	1	1	1	1	0	0	0	0	0	1	1	0	6
20/12 - 5.3. K4	1	1	1	1	0	0	0	0	0	1	1	0	6
20/12 - 5.3. K5	1	1	1	1	0	0	0	0	0	0	0	0
20/12 - 5.3. K6	1	1	1	1	0	1	0	1	0	0	2	0	24
20/12 - 5.3. K7	1	1	1	1	0	1	0	0	1	0	2	0	25
20/12 - 5.3. K8	1	1	1	1	1	1	0	0	1	0	3	1	125
20/12 - 5.3. K9	1	1	1	1	0	0	0	0	0	1	1	0	6
20/12 - 5.3. K10	1	1	1	1	0	0	0	0	0	1	1	0	6
20/12 - 5.3. K11	1	1	1	1	0	1	0	0	0	0	1	0	2
20/12 - 5.3. K12	1	1	1	1	0	0	0	0	0	0	0	0
20/12 - 5.3. K13	1	1	1	1	0	1	0	0	0	0	1	0	2
20/12 - 5.3. K14	1	1	1	1	0	1	0	0	0	0	1	0	2
20/12 - 5.3. K16	1	1	1	1	0	0	0	0	0	0	0	0
20/12 - 5.3. K17	1	1	1	1	0	0	0	0	0	0	0	0
20/12 - 5.3. K18	1	1	1	1	0	1	0	0	0	0	1	0	2
20/12 - 5.3. K19	1	1	1	1	0	0	0	0	0	0	0	0
20/12 - 5.3. K20	1	1	1	1	0	0	0	0	0	0	0	0
20/12 - 5.3. K21	1	1	1	1	0	0	0	0	0	0	0	0
20/12 - 5.3. K22	1	1	1	1	0	0	0	0	0	0	0	0
22/6 - 5.3. K1	1	1	1	1	1	1	0	1	1	0	4	1	1245
22/6 - 5.3. K2	1	1	1	1	0	1	0	0	0	0	1	0	2
22/6 - 5.3. K3	1	1	1	1	1	1	0	1	1	0	4	1	1245
22/6 - 5.3. K4	1	1	1	1	1	1	0	1	1	0	4	1	1245
22/6 - 5.3. K5	1	1	1	1	0	1	0	0	1	0	2	0	25
22/6 - 5.3. K6	1	1	1	1	0	0	0	0	0	1	1	0	6
22/6 - 5.3. K7	1	1	1	1	0	1	0	1	0	0	2	0	24
22/6 - 5.3. K8	1	1	1	1	0	1	0	1	1	0	3	1	245
22/6 - 5.3. K9	1	1	1	1	0	1	0	1	1	0	3	1	245
22/6 - 5.3. K10	1	1	1	1	1	1	0	0	1	0	3	1	125
22/6 - 5.3. K11	1	1	1	1	0	0	0	0	0	1	1	0	6
22/6 - 5.3. K12	1	1	1	1	0	0	0	0	0	1	1	0	6
22/6 - 5.3. K13	1	1	1	1	0	0	0	0	0	0	0	0
22/6 - 5.3. K14	1	1	1	1	0	0	0	0	0	0	0	0
22/6 - 5.3. K15	1	1	1	1	0	1	0	1	0	0	2	0	24
22/6 - 5.3. K16	1	1	1	1	0	1	0	0	0	0	1	0	2
22/6 - 5.3. K17	1	1	1	1	1	1	0	1	1	0	4	1	1245
22/6 - 5.3. K18	1	1	1	1	1	1	0	1	1	0	4	1	1245
22/6 - 5.3. K19	1	1	1	1	0	0	0	0	0	0	0	0
22/6 - 5.3. K20	1	1	1	1	0	0	0	0	0	0	0	0
22/6 - 5.3. K21	1	1	1	1	0	1	0	0	0	0	1	0	2
22/6 - 5.3. K22	1	1	1	1	0	1	0	0	0	0	1	0	2
20/3 - 5.3. K1	2	1	1	1	1	1	0	0	1	0	3	1	125
20/3 - 5.3. K2	2	1	1	1	1	1	0	1	1	0	4	1	1245
20/3 - 5.3. K3	2	1	1	1	0	0	0	0	0	1	1	0	6
20/3 - 5.3. K4	2	1	1	1	0	0	0	0	0	1	1	0	6
20/3 - 5.3. K5	2	1	1	1	0	1	0	1	0	0	2	0	24
20/3 - 5.3. K6	2	1	1	1	0	1	0	0	0	0	1	0	2
20/3 - 5.3. K7	2	1	1	1	1	1	0	0	1	0	3	1	125
20/3 - 5.3. K8	2	1	1	1	1	1	0	1	1	0	4	1	1245
20/3 - 5.3. K9	2	1	1	1	0	0	0	0	0	1	1	0	6
20/3 - 5.3. K10	2	1	1	1	0	0	0	0	0	1	1	0	6
20/3 - 5.3. K11	2	1	1	1	0	1	0	0	0	0	1	0	2
20/3 - 5.3. K12	2	1	1	1	0	0	0	0	0	0	0	0
20/3 - 5.3. K13	2	1	1	1	0	1	0	0	0	0	1	0	2
20/3 - 5.3. K14	2	1	1	1	0	0	0	0	0	0	0	0
20/3 - 5.3. K15	2	1	1	1	0	0	0	0	0	0	0	0
20/3 - 5.3. K16	2	1	1	1	0	0	0	0	0	0	0	0
20/3 - 5.3. K17	2	1	1	1	0	1	0	0	0	0	1	0	2
20/3 - 5.3. K18	2	1	1	1	0	1	0	0	0	0	1	0	2
20/3 - 5.3. K19	2	1	1	1	0	1	0	0	0	0	1	0	2
20/3 - 5.3. K20	2	1	1	1	0	1	0	0	0	0	1	0	2
20/3 - 5.3. K21	2	1	1	1	0	1	0	0	0	0	1	0	2
20/3 - 5.3. K22	2	1	1	1	0	1	0	1	0	0	2	0	24
24/4 - 5.3. K1	2	1	1	1	1	0	0	0	1	0	2	0	15
24/4 - 5.3. K2	2	1	1	1	0	0	0	0	0	1	1	0	6
24/4 - 5.3. K3	2	1	1	1	0	0	0	0	0	1	1	0	6
24/4 - 5.3. K4	2	1	1	1	0	0	0	0	0	1	1	0	6
24/4 - 5.3. K5	2	1	1	1	0	1	0	1	0	0	2	0	24
24/4 - 5.3. K6	2	1	1	1	0	1	0	1	0	0	2	0	24
24/4 - 5.3. K7	2	1	1	1	0	0	0	0	1	0	1	0	5
24/4 - 5.3. K8	2	1	1	1	0	1	0	0	1	0	2	0	25
24/4 - 5.3. K9	2	1	1	1	0	0	0	0	0	1	1	0	6
24/4 - 5.3. K10	2	1	1	1	0	0	0	0	0	1	1	0	6
24/4 - 5.3. K11	2	1	1	1	0	0	0	0	0	0	0	0
24/4 - 5.3. K12	2	1	1	1	0	0	0	0	0	0	0	0
24/4 - 5.3. K13	2	1	1	1	0	0	0	0	0	0	0	0
24/4 - 5.3. K14	2	1	1	1	0	0	0	0	0	0	0	0
24/4 - 5.3. K15	2	1	1	1	0	0	0	0	0	0	0	0
24/4 - 5.3. K16	2	1	1	1	0	0	0	0	0	0	0	0
24/4 - 5.3. K17	2	1	1	1	0	0	0	0	0	0	0	0
24/4 - 5.3. K18	2	1	1	1	0	0	0	0	0	0	0	0
24/4 - 5.3. K19	2	1	1	1	0	0	0	0	0	0	0	0
24/4 - 5.3. K20	2	1	1	1	0	0	0	0	0	0	0	0
24/4 - 5.3. K21	2	1	1	1	0	0	0	0	0	0	0	0
24/4 - 5.3. K22	2	1	1	1	0	0	0	0	0	0	0	0
27/1 - 5.3. K1	2	1	1	1	1	0	0	0	1	0	2	0	15
27/1 - 5.3. K2	2	1	1	1	1	0	0	1	1	0	3	1	145
27/1 - 5.3. K3	2	1	1	1	0	0	0	0	0	1	1	0	6
27/1 - 5.3. K4	2	1	1	1	0	0	0	0	0	1	1	0	6
27/1 - 5.3. K5	2	1	1	1	0	1	0	1	0	0	2	0	24
27/1 - 5.3. K6	2	1	1	1	0	1	0	1	1	0	3	1	245
27/1 - 5.3. K7	2	1	1	1	1	0	0	0	1	0	2	0	15
27/1 - 5.3. K8	2	1	1	1	0	1	0	1	1	0	3	1	245
27/1 - 5.3. K9	2	1	1	1	0	0	0	0	0	1	1	0	6
27/1 - 5.3. K10	2	1	1	1	0	0	0	0	0	1	1	0	6
27/1 - 5.3. K11	2	1	1	1	0	1	0	0	0	0	1	0	2
27/1 - 5.3. K12	2	1	1	1	0	1	0	0	0	0	1	0	2
27/1 - 5.3. K13	2	1	1	1	0	0	0	0	0	0	0	0
27/1 - 5.3. K14	2	1	1	1	0	1	0	0	0	0	1	0	2
27/1 - 5.3. K15	2	1	1	1	0	1	0	0	0	0	1	0	2
27/1 - 5.3. K16	2	1	1	1	0	1	0	0	0	0	1	0	2
27/1 - 5.3. K17	2	1	1	1	0	1	0	0	0	0	1	0	2
27/1 - 5.3. K18	2	1	1	1	0	1	0	0	0	0	1	0	2
27/1 - 5.3. K19	2	1	1	1	0	1	0	0	0	0	1	0	2
27/1 - 5.3. K20	2	1	1	1	0	1	0	0	0	0	1	0	2
27/1 - 5.3. K21	2	1	1	1	0	1	0	0	0	0	1	0	2
27/1 - 5.3. K22	2	1	1	1	0	0	0	0	0	0	0	0
22/5 - 5.3. K1	2	1	1	1	1	1	0	1	1	0	4	1	1245
22/5 - 5.3. K2	2	1	1	1	1	1	0	1	1	0	4	1	1245
22/5 - 5.3. K3	2	1	1	1	0	1	0	0	0	0	1	0	2
22/5 - 5.3. K4	2	1	1	1	1	1	0	1	1	0	4	1	1245
22/5 - 5.3. K5	2	1	1	1	0	0	0	0	0	1	1	0	6
22/5 - 5.3. K6	2	1	1	1	0	1	0	0	1	0	2	0	25
22/5 - 5.3. K7	2	1	1	1	1	1	0	1	1	0	4	1	1245
22/5 - 5.3. K8	2	1	1	1	0	1	0	1	0	0	2	0	24
22/5 - 5.3. K9	2	1	1	1	1	1	0	0	1	0	3	1	125
22/5 - 5.3. K10	2	1	1	1	1	1	0	1	1	0	4	1	1245
22/5 - 5.3. K11	2	1	1	1	0	0	0	0	0	1	1	0	6
22/5 - 5.3. K12	2	1	1	1	0	0	0	0	0	1	1	0	6
22/5 - 5.3. K13	2	1	1	1	0	1	0	0	0	0	1	0	2
22/5 - 5.3. K14	2	1	1	1	0	1	0	0	0	0	1	0	2
22/5 - 5.3. K15	2	1	1	1	0	1	0	0	0	0	1	0	2
22/5 - 5.3. K16	2	1	1	1	0	1	0	0	0	0	1	0	2
22/5 - 5.3. K17	2	1	1	1	0	1	0	0	0	0	1	0	2
22/5 - 5.3. K18	2	1	1	1	0	1	0	0	0	0	1	0	2
22/5 - 5.3. K19	2	1	1	1	0	0	0	0	0	0	0	0
22/5 - 5.3. K20	2	1	1	1	0	1	0	0	0	0	1	0	2
22/5 - 5.3. K21	2	1	1	1	0	0	0	0	0	0	0	0
22/5 - 5.3. K22	2	1	1	1	0	1	0	0	0	0	1	0	2
23/8 -5.3. K1	2	1	1	1	1	1	0	1	1	0	4	1	1245
23/8 -5.3. K2	2	1	1	1	1	1	0	1	1	0	4	1	1245
23/8 -5.3. K3	2	1	1	1	0	1	0	0	0	0	1	0	2
23/8 -5.3. K4	2	1	1	1	0	1	0	0	0	0	1	0	2
23/8 -5.3. K5	2	1	1	1	0	0	0	0	0	1	1	0	6
23/8 -5.3. K6	2	1	1	1	0	0	0	0	0	1	1	0	6
23/8 -5.3. K7	2	1	1	1	1	1	0	1	1	0	4	1	1245
23/8 -5.3. K8	2	1	1	1	0	1	0	0	0	0	1	0	2
23/8 -5.3. K9	2	1	1	1	1	1	0	1	1	0	4	1	1245
23/8 -5.3. K10	2	1	1	1	1	1	0	0	1	0	3	1	125
23/8 -5.3. K11	2	1	1	1	0	0	0	0	0	1	1	0	6
23/8 -5.3. K12	2	1	1	1	0	0	0	0	0	1	1	0	6
23/8 -5.3. K13	2	1	1	1	0	0	0	0	0	0	0	0
23/8 -5.3. K14	2	1	1	1	0	1	0	0	0	0	1	0	2
23/8 -5.3. K15	2	1	1	1	0	1	0	1	0	0	2	0	24
23/8 -5.3. K16	2	1	1	1	0	1	0	0	0	0	1	0	2
23/8 -5.3. K17	2	1	1	1	0	0	0	0	0	0	0	0
23/8 -5.3. K18	2	1	1	1	0	0	0	0	0	0	0	0
23/8 -5.3. K19	2	1	1	1	0	1	0	0	0	0	1	0	2
23/8 -5.3. K20	2	1	1	1	0	0	0	0	0	0	0	0
23/8 -5.3. K21	2	1	1	1	0	1	0	0	0	0	1	0	2
23/8 -5.3. K22	2	1	1	1	0	0	0	0	0	0	0	0
23/8 -5.3. K23	2	1	1	1	0	0	0	0	0	0	0	0
23/9 - 5.3. K1	2	1	1	1	0	1	0	0	0	0	1	0	2
23/9 - 5.3. K2	2	1	1	1	1	1	0	1	1	0	4	1	1245
23/9 - 5.3. K3	2	1	1	1	0	0	0	0	0	1	1	0	6
23/9 - 5.3. K4	2	1	1	1	0	0	0	0	0	1	1	0	6
23/9 - 5.3. K5	2	1	1	1	1	1	0	1	1	0	4	1	1245
23/9 - 5.3. K6	2	1	1	1	0	1	0	1	0	0	2	0	24
23/9 - 5.3. K7	2	1	1	1	1	1	0	0	1	0	3	1	125
23/9 - 5.3. K8	2	1	1	1	1	1	0	1	1	0	4	1	1245
23/9 - 5.3. K9	2	1	1	1	0	0	0	0	0	1	1	0	6
23/9 - 5.3. K10	2	1	1	1	0	0	0	0	0	1	1	0	6
23/9 - 5.3. K11	2	1	1	1	0	0	0	0	0	0	0	0
23/9 - 5.3. K12	2	1	1	1	0	1	0	0	0	0	1	0	2
23/9 - 5.3. K13	2	1	1	1	0	1	0	0	0	0	1	0	2
23/9 - 5.3. K14	2	1	1	1	0	0	0	0	0	0	0	0
23/9 - 5.3. K15	2	1	1	1	0	1	0	0	0	0	1	0	2
23/9 - 5.3. K16	2	1	1	1	0	1	0	1	0	0	2	0	24
23/9 - 5.3. K17	2	1	1	1	0	0	0	0	0	0	0	0
23/9 - 5.3. K18	2	1	1	1	0	1	0	1	0	0	2	0	24
23/9 - 5.3. K19	2	1	1	1	0	0	0	0	0	0	0	0
23/9 - 5.3. K20	2	1	1	1	0	0	0	0	0	0	0	0
23/9 - 5.3. K21	2	1	1	1	0	0	0	0	0	0	0	0
23/9 - 5.3. K22	2	1	1	1	0	1	0	0	0	0	1	0	2
27/3 - 6.3. K1	1	1	1	1	1	1	0	1	1	0	4	1	1245
27/3 - 6.3. K2	1	1	1	1	1	1	0	0	1	0	3	1	125
27/3 - 6.3. K3	1	1	1	1	0	0	0	0	0	1	1	0	6
27/3 - 6.3. K4	1	1	1	1	0	0	0	0	0	1	1	0	6
27/3 - 6.3. K5	1	1	1	1	0	1	0	1	0	0	2	0	24
27/3 - 6.3. K6	1	1	1	1	1	1	0	1	1	0	4	1	1245
27/3 - 6.3. K7	1	1	1	1	0	1	0	0	1	0	2	0	25
27/3 - 6.3. K8	1	1	1	1	0	0	0	0	0	0	0	0
27/3 - 6.3. K9	1	1	1	1	0	0	0	0	0	1	1	0	6
27/3 - 6.3. K10	1	1	1	1	0	0	0	0	0	1	1	0	6
27/3 - 6.3. K11	1	1	1	1	0	0	0	0	0	0	0	0
27/3 - 6.3. K12	1	1	1	1	0	0	0	0	0	0	0	0
27/3 - 6.3. K13	1	1	1	1	0	0	0	0	0	0	0	0
27/3 - 6.3. K14	1	1	1	1	0	0	0	0	0	0	0	0
27/3 - 6.3. K15	1	1	1	1	0	0	0	0	0	0	0	0
27/3 - 6.3. K16	1	1	1	1	0	0	0	0	0	0	0	0
27/3 - 6.3. K17	1	1	1	1	0	0	0	0	0	0	0	0
27/3 - 6.3. K18	1	1	1	1	0	0	0	0	0	0	0	0
27/3 - 6.3. K19	1	1	1	1	0	0	0	0	0	0	0	0
27/3 - 6.3. K20	1	1	1	1	0	0	0	0	0	0	0	0
27/3 - 6.3. K21	1	1	1	1	0	0	0	0	0	0	0	0
27/3 - 6.3. K22	1	1	1	1	0	0	0	0	0	0	0	0
24/6 - 6.3. K1	2	1	1	1	1	1	0	1	1	0	4	1	1245
24/6 - 6.3. K2	2	1	1	1	1	1	0	1	1	0	4	1	1245
24/6 - 6.3. K3	2	1	1	1	1	1	0	1	1	0	4	1	1245
24/6 - 6.3. K4	2	1	1	1	1	1	0	1	1	0	4	1	1245
24/6 - 6.3. K5	2	1	1	1	1	0	0	0	0	0	1	0	1
24/6 - 6.3. K6	2	1	1	1	0	1	0	0	1	0	2	0	25
24/6 - 6.3. K7	2	1	1	1	1	1	0	1	1	0	4	1	1245
24/6 - 6.3. K8	2	1	1	1	1	1	0	1	1	0	4	1	1245
24/6 - 6.3. K9	2	1	1	1	0	1	0	0	1	0	2	0	25
24/6 - 6.3. K10	2	1	1	1	0	1	0	0	1	0	2	0	25
24/6 - 6.3. K11	2	1	1	1	0	0	0	0	1	1	2	0	56
24/6 - 6.3. K12	2	1	1	1	0	0	0	0	1	1	2	0	56
24/6 - 6.3. K15	2	1	1	1	0	1	0	1	0	0	2	0	24
24/6 - 6.3. K16	2	1	1	1	1	1	0	1	1	0	4	1	1245
24/6 - 6.3. K17	2	1	1	1	0	1	0	0	0	0	1	0	2
24/6 - 6.3. K18	2	1	1	1	0	1	0	0	0	0	1	0	2
24/6 - 6.3. K19	2	1	1	1	0	0	0	0	0	0	0	0
24/6 - 6.3. K20	2	1	1	1	0	0	0	0	0	1	1	0	6
24/6 - 6.3. K21	2	1	1	1	0	1	0	0	0	0	1	0	2
24/6 - 6.3. K22	2	1	1	1	0	0	0	0	0	0	0	0
22/7 - 6.3. K1	1	1	1	1	1	1	0	1	1	0	4	1	1245
22/7 - 6.3. K2	1	1	1	1	1	0	0	0	1	0	2	0	15
22/7 - 6.3. K3	1	1	1	1	1	1	0	1	1	0	4	1	1245
22/7 - 6.3. K4	1	1	1	1	0	1	0	1	1	0	3	1	245
22/7 - 6.3. K5	1	1	1	1	0	1	0	1	1	0	3	1	245
22/7 - 6.3. K6	1	1	1	1	1	1	0	1	1	0	4	1	1245
22/7 - 6.3. K7	1	1	1	1	0	1	0	1	1	0	3	1	245
22/7 - 6.3. K8	1	1	1	1	1	0	0	0	1	0	2	0	15
22/7 - 6.3. K9	1	1	1	1	1	0	0	0	1	0	2	0	15
22/7 - 6.3. K10	1	1	1	1	1	1	0	1	1	0	4	1	1245
22/7 - 6.3. K12	1	1	1	1	0	0	0	0	1	0	1	0	5
22/7 - 6.3. K13	1	1	1	1	0	0	0	0	0	0	0	0
22/7 - 6.3. K14	1	1	1	1	0	0	0	0	0	0	0	0
22/7 - 6.3. K17	1	1	1	1	0	0	0	0	0	0	0	0
22/7 - 6.3. K18	1	1	1	1	0	0	0	0	0	0	0	0
22/7 - 6.3. K19	1	1	1	1	0	0	0	0	0	0	0	0
22/7 - 6.3. K20	1	1	1	1	0	1	0	0	0	0	1	0	2
22/7 - 6.3. K21	1	1	1	1	0	0	0	0	0	0	0	0
22/7 - 6.3. K22	1	1	1	1	0	0	0	0	0	0	0	0
22/8 - 6.3. K1	1	1	1	1	1	1	0	1	1	0	4	1	1245
22/8 - 6.3. K2	1	1	1	1	1	1	0	1	1	0	4	1	1245
22/8 - 6.3. K3	1	1	1	1	1	1	0	1	1	0	4	1	1245
22/8 - 6.3. K4	1	1	1	1	1	1	0	1	1	0	4	1	1245
22/8 - 6.3. K5	1	1	1	1	0	1	0	0	1	0	2	0	25
22/8 - 6.3. K6	1	1	1	1	0	1	0	0	1	0	2	0	25
22/8 - 6.3. K7	1	1	1	1	1	1	0	1	1	0	4	1	1245
22/8 - 6.3. K8	1	1	1	1	0	1	0	1	0	0	2	0	24
22/8 - 6.3. K9	1	1	1	1	1	1	0	1	1	0	4	1	1245
22/8 - 6.3. K10	1	1	1	1	1	1	0	1	1	0	4	1	1245
22/8 - 6.3. K11	1	1	1	1	0	1	0	0	0	0	1	0	2
22/8 - 6.3. K12	1	1	1	1	0	0	0	0	0	0	0	0
22/8 - 6.3. K13	1	1	1	1	0	1	0	0	0	0	1	0	2
22/8 - 6.3. K14	1	1	1	1	0	0	0	0	0	0	0	0
22/8 - 6.3. K15	1	1	1	1	0	0	0	0	0	0	0	0
22/8 - 6.3. K16	1	1	1	1	0	0	0	0	0	0	0	0
22/8 - 6.3. K17	1	1	1	1	0	0	0	0	0	0	0	0
22/8 - 6.3. K18	1	1	1	1	0	0	0	0	0	0	0	0
22/8 - 6.3. K19	1	1	1	1	0	0	0	0	0	0	0	0
22/8 - 6.3. K20	1	1	1	1	0	0	0	0	0	0	0	0
22/8 - 6.3. K21	1	1	1	1	0	1	0	0	0	0	1	0	2
22/8 - 6.3. K22	1	1	1	1	0	0	0	0	0	0	0	0
22/9 - 6.3. K1	1	1	1	1	1	1	0	1	1	0	4	1	1245
22/9 - 6.3. K2	1	1	1	1	1	1	0	1	1	0	4	1	1245
22/9 - 6.3. K3	1	1	1	1	0	0	0	0	0	1	1	0	6
22/9 - 6.3. K4	1	1	1	1	0	0	0	0	0	1	1	0	6
22/9 - 6.3. K5	1	1	1	1	0	1	0	0	1	0	2	0	25
22/9 - 6.3. K6	1	1	1	1	0	1	0	0	1	0	2	0	25
22/9 - 6.3. K7	1	1	1	1	0	1	0	1	0	0	2	0	24
22/9 - 6.3. K8	1	1	1	1	0	1	0	0	1	0	2	0	25
22/9 - 6.3. K9	1	1	1	1	1	1	0	1	1	0	4	1	1245
22/9 - 6.3. K10	1	1	1	1	0	1	0	1	1	0	3	1	245
22/9 - 6.3. K16	1	1	1	1	0	1	0	0	0	0	1	0	2
22/9 - 6.3. K17	1	1	1	1	0	1	0	0	0	0	1	0	2
22/9 - 6.3. K18	1	1	1	1	0	1	0	0	0	0	1	0	2
22/9 - 6.3. K19	1	1	1	1	0	1	0	0	0	0	1	0	2
22/9 - 6.3. K20	1	1	1	1	0	1	0	1	1	0	3	1	245
22/9 - 6.3. K21	1	1	1	1	0	1	0	0	0	0	1	0	2
22/9 - 6.3. K22	1	1	1	1	0	1	0	0	0	0	1	0	2
23/7 - 6.3. K1	1	1	1	1	1	1	0	1	1	0	4	1	1245
23/7 - 6.3. K2	1	1	1	1	1	1	0	1	1	0	4	1	1245
23/7 - 6.3. K3	1	1	1	1	1	0	0	0	0	0	1	0	1
23/7 - 6.3. K4	1	1	1	1	0	0	0	0	0	1	1	0	6
23/7 - 6.3. K5	1	1	1	1	0	1	0	1	0	0	2	0	24
23/7 - 6.3. K6	1	1	1	1	1	1	0	1	1	0	4	1	1245
23/7 - 6.3. K7	1	1	1	1	1	1	0	1	1	0	4	1	1245
23/7 - 6.3. K8	1	1	1	1	0	0	0	0	1	0	1	0	5
23/7 - 6.3. K9	1	1	1	1	0	0	0	0	0	1	1	0	6
23/7 - 6.3. K10	1	1	1	1	0	0	0	0	0	1	1	0	6
23/7 - 6.3. K11	1	1	1	1	0	0	0	0	0	0	0	0
23/7 - 6.3. K12	1	1	1	1	0	1	0	0	0	0	1	0	2
23/7 - 6.3. K13	1	1	1	1	1	0	0	0	0	0	1	0	1
23/7 - 6.3. K14	1	1	1	1	0	0	0	0	0	0	0	0
23/7 - 6.3. K15	1	1	1	1	0	1	0	0	0	0	1	0	2
23/7 - 6.3. K16	1	1	1	1	0	0	0	0	0	0	0	0
23/7 - 6.3. K17	1	1	1	1	1	1	0	1	1	0	4	1	1245
23/7 - 6.3. K18	1	1	1	1	0	0	0	0	0	0	0	0
23/7 - 6.3. K19	1	1	1	1	0	0	0	0	0	0	0	0
23/7 - 6.3. K20	1	1	1	1	0	1	0	0	0	0	1	0	2
23/7 - 6.3. K21	1	1	1	1	1	1	0	1	1	0	4	1	1245
23/7 - 6.3. K22	1	1	1	1	0	0	0	0	0	0	0	0
24/12 - 6.3. K1	1	1	1	1	1	1	0	1	1	0	4	1	1245
24/12 - 6.3. K2	1	1	1	1	1	1	0	1	1	0	4	1	1245
24/12 - 6.3. K3	1	1	1	1	1	0	0	0	0	0	1	0	1
24/12 - 6.3. K4	1	1	1	1	0	0	0	0	0	1	1	0	6
24/12 - 6.3. K5	1	1	1	1	0	1	0	1	0	0	2	0	24
24/12 - 6.3. K6	1	1	1	1	0	1	0	1	0	0	2	0	24
24/12 - 6.3. K7	1	1	1	1	1	1	0	1	1	0	4	1	1245
24/12 - 6.3. K8	1	1	1	1	1	1	0	1	1	0	4	1	1245
24/12 - 6.3. K9	1	1	1	1	0	0	0	0	0	1	1	0	6
24/12 - 6.3. K10	1	1	1	1	0	0	0	0	0	1	1	0	6
24/12 - 6.3. K11	1	1	1	1	0	1	0	0	0	0	1	0	2
24/12 - 6.3. K13	1	1	1	1	0	1	0	0	0	0	1	0	2
24/12 - 6.3. K14	1	1	1	1	0	0	0	0	0	0	0	0
24/12 - 6.3. K15	1	1	1	1	0	0	0	0	0	0	0	0
24/12 - 6.3. K16	1	1	1	1	1	0	0	0	0	0	1	0	1
24/12 - 6.3. K17	1	1	1	1	0	0	0	0	0	0	0	0
24/12 - 6.3. K18	1	1	1	1	0	0	0	0	0	0	0	0
24/12 - 6.3. K19	1	1	1	1	0	0	0	0	0	0	0	0
24/12 - 6.3. K20	1	1	1	1	0	1	0	1	0	0	2	0	24
24/12 - 6.3. K21	1	1	1	1	0	0	0	0	0	0	0	0
24/12 - 6.3. K22	1	1	1	1	0	0	0	0	0	0	0	0
23/10 - 6.3. K1	2	1	1	1	1	1	0	0	1	0	3	1	125
23/10 - 6.3. K2	2	1	1	1	1	1	0	1	1	0	4	1	1245
23/10 - 6.3. K3	2	1	1	1	1	1	0	0	1	0	3	1	125
23/10 - 6.3. K4	2	1	1	1	0	1	0	0	1	0	2	0	25
23/10 - 6.3. K5	2	1	1	1	0	0	0	0	0	0	0	0
23/10 - 6.3. K6	2	1	1	1	0	1	0	1	1	0	3	1	245
23/10 - 6.3. K7	2	1	1	1	1	1	0	1	1	0	4	1	1245
23/10 - 6.3. K8	2	1	1	1	0	1	0	1	0	0	2	0	24
23/10 - 6.3. K9	2	1	1	1	1	1	0	0	1	0	3	1	125
23/10 - 6.3. K10	2	1	1	1	0	1	0	1	1	0	3	1	245
23/10 - 6.3. K11	2	1	1	1	0	0	0	0	0	0	0	0
23/10 - 6.3. K12	2	1	1	1	0	0	0	0	0	0	0	0
23/10 - 6.3. K13	2	1	1	1	0	1	0	1	1	0	3	1	245
23/10 - 6.3. K14	2	1	1	1	0	0	0	0	0	0	0	0
23/10 - 6.3. K15	2	1	1	1	0	0	0	0	0	0	0	0
23/10 - 6.3. K16	2	1	1	1	0	0	0	0	0	0	0	0
23/10 - 6.3. K17	2	1	1	1	0	0	0	0	0	0	0	0
23/10 - 6.3. K18	2	1	1	1	0	1	0	0	1	0	2	0	25
23/10 - 6.3. K19	2	1	1	1	0	0	0	0	0	0	0	0
23/10 - 6.3. K20	2	1	1	1	0	0	0	0	0	0	0	0
23/10 - 6.3. K21	2	1	1	1	0	0	0	0	0	0	0	0
23/10 - 6.3. K22	2	1	1	1	0	0	0	0	0	0	0	0
23/12 - 6.3. K1	2	1	1	1	1	1	0	1	1	0	4	1	1245
23/12 - 6.3. K2	2	1	1	1	1	1	0	1	1	0	4	1	1245
23/12 - 6.3. K3	2	1	1	1	1	1	0	1	1	0	4	1	1245
23/12 - 6.3. K4	2	1	1	1	0	0	0	0	0	1	1	0	6
23/12 - 6.3. K5	2	1	1	1	1	0	0	0	0	0	1	0	1
23/12 - 6.3. K6	2	1	1	1	0	1	0	1	0	0	2	0	24
23/12 - 6.3. K7	2	1	1	1	0	1	0	1	0	0	2	0	24
23/12 - 6.3. K8	2	1	1	1	1	1	0	0	1	0	3	1	125
23/12 - 6.3. K9	2	1	1	1	1	1	0	0	1	0	3	1	125
23/12 - 6.3. K10	2	1	1	1	1	1	0	1	1	0	4	1	1245
23/12 - 6.3. K12	2	1	1	1	0	0	0	0	0	0	0	0
23/12 - 6.3. K14	2	1	1	1	0	0	0	0	0	0	0	0
23/12 - 6.3. K15	2	1	1	1	0	0	0	0	0	0	0	0
23/12 - 6.3. K16	2	1	1	1	0	0	0	0	0	0	0	0
23/12 - 6.3. K17	2	1	1	1	0	0	0	0	0	0	0	0
23/12 - 6.3. K18	2	1	1	1	0	0	0	0	0	0	0	0
23/12 - 6.3. K19	2	1	1	1	0	0	0	0	0	0	0	0
23/12 - 6.3. K20	2	1	1	1	0	0	0	0	0	0	0	0
23/12 - 6.3. K21	2	1	1	1	0	0	0	0	0	0	0	0
23/12 - 6.3. K22	2	1	1	1	0	1	0	1	0	0	2	0	24
24/10 - 6.3. K1	2	1	1	1	1	1	0	1	1	0	4	1	1245
24/10 - 6.3. K2	2	1	1	1	1	1	0	1	1	0	4	1	1245
24/10 - 6.3. K3	2	1	1	1	1	1	0	1	1	0	4	1	1245
24/10 - 6.3. K4	2	1	1	1	1	1	0	1	1	0	4	1	1245
24/10 - 6.3. K5	2	1	1	1	0	0	0	0	0	1	1	0	6
24/10 - 6.3. K6	2	1	1	1	1	0	0	0	0	0	1	0	1
24/10 - 6.3. K7	2	1	1	1	1	1	0	1	1	0	4	1	1245
24/10 - 6.3. K8	2	1	1	1	1	1	0	1	1	0	4	1	1245
24/10 - 6.3. K9	2	1	1	1	1	1	0	1	1	0	4	1	1245
24/10 - 6.3. K10	2	1	1	1	1	1	0	1	1	0	4	1	1245
24/10 - 6.3. K11	2	1	1	1	0	0	0	0	0	1	1	0	6
24/10 - 6.3. K12	2	1	1	1	0	0	0	0	0	1	1	0	6
24/10 - 6.3. K15	2	1	1	1	1	1	0	1	1	0	4	1	1245
24/10 - 6.3. K16	2	1	1	1	0	1	0	0	1	0	2	0	25
24/10 - 6.3. K17	2	1	1	1	0	1	0	1	1	0	3	1	245
24/10 - 6.3. K18	2	1	1	1	1	1	0	1	1	0	4	1	1245
24/10 - 6.3. K19	2	1	1	1	1	0	0	0	0	0	1	0	1
24/10 - 6.3. K20	2	1	1	1	1	1	0	1	1	0	4	1	1245
24/10 - 6.3. K21	2	1	1	1	0	1	0	1	1	0	3	1	245
24/10 - 6.3. K22	2	1	1	1	0	0	0	0	0	0	0	0
24/11 - 6.3. K1	2	1	1	1	1	1	0	1	1	0	4	1	1245
24/11 - 6.3. K2	2	1	1	1	1	1	0	1	1	0	4	1	1245
24/11 - 6.3. K3	2	1	1	1	0	0	0	0	0	1	1	0	6
24/11 - 6.3. K4	2	1	1	1	0	0	0	0	0	1	1	0	6
24/11 - 6.3. K5	2	1	1	1	0	1	0	1	0	0	2	0	24
24/11 - 6.3. K6	2	1	1	1	0	1	0	1	0	0	2	0	24
24/11 - 6.3. K7	2	1	1	1	1	1	0	1	1	0	4	1	1245
24/11 - 6.3. K8	2	1	1	1	1	1	0	1	1	0	4	1	1245
24/11 - 6.3. K9	2	1	1	1	0	0	0	0	0	1	1	0	6
24/11 - 6.3. K10	2	1	1	1	0	0	0	0	0	0	0	0
24/11 - 6.3. K11	2	1	1	1	0	0	0	0	0	0	0	0
24/11 - 6.3. K12	2	1	1	1	0	0	0	0	0	0	0	0
24/11 - 6.3. K13	2	1	1	1	0	0	0	0	0	0	0	0
24/11 - 6.3. K14	2	1	1	1	0	1	0	0	0	0	1	0	2
24/11 - 6.3. K16	2	1	1	1	0	1	0	0	0	0	1	0	2
24/11 - 6.3. K17	2	1	1	1	0	1	0	0	0	0	1	0	2
24/11 - 6.3. K18	2	1	1	1	0	0	0	0	0	0	0	0
24/11 - 6.3. K19	2	1	1	1	0	1	0	0	0	0	1	0	2
24/11 - 6.3. K20	2	1	1	1	0	1	0	0	0	0	1	0	2
24/11 - 6.3. K21	2	1	1	1	0	1	0	0	0	0	1	0	2
24/11 - 6.3. K22	2	1	1	1	0	1	0	0	0	0	1	0	2
27/9 - 6.3. K1	2	1	1	1	1	1	0	1	1	0	4	1	1245
27/9 - 6.3. K2	2	1	1	1	1	1	0	1	1	0	4	1	1245
27/9 - 6.3. K3	2	1	1	1	0	0	0	0	0	1	1	0	6
27/9 - 6.3. K4	2	1	1	1	0	0	0	0	0	1	1	0	6
27/9 - 6.3. K5	2	1	1	1	1	1	0	1	1	0	4	1	1245
27/9 - 6.3. K6	2	1	1	1	0	1	0	1	0	0	2	0	24
27/9 - 6.3. K7	2	1	1	1	1	1	0	1	1	0	4	1	1245
27/9 - 6.3. K8	2	1	1	1	1	0	0	0	0	0	1	0	1
27/9 - 6.3. K9	2	1	1	1	0	0	0	0	0	1	1	0	6
27/9 - 6.3. K10	2	1	1	1	0	0	0	0	0	1	1	0	6
27/9 - 6.3. K11	2	1	1	1	0	0	0	0	0	0	0	0
27/9 - 6.3. K12	2	1	1	1	0	0	0	0	0	0	0	0
27/9 - 6.3. K13	2	1	1	1	0	0	0	0	0	0	0	0
27/9 - 6.3. K14	2	1	1	1	0	0	0	0	0	0	0	0
27/9 - 6.3. K15	2	1	1	1	0	0	0	0	0	0	0	0
27/9 - 6.3. K16	2	1	1	1	0	0	0	0	0	0	0	0
27/9 - 6.3. K17	2	1	1	1	0	0	0	0	0	0	0	0
27/9 - 6.3. K18	2	1	1	1	0	0	0	0	0	0	0	0
27/9 - 6.3. K19	2	1	1	1	0	0	0	0	0	0	0	0
27/9 - 6.3. K20	2	1	1	1	0	0	0	0	0	0	0	0
27/9 - 6.3. K21	2	1	1	1	0	0	0	0	0	0	0	0
27/9 - 6.3. K22	2	1	1	1	0	0	0	0	0	0	0	0
23/4 - 17.3. K1	1	1	1	2	1	1	0	1	1	0	4	1	1245
23/4 - 17.3. K2	1	1	1	2	1	1	0	1	1	0	4	1	1245
23/4 - 17.3. K3	1	1	1	2	0	0	0	0	0	0	0	0
23/4 - 17.3. K5	1	1	1	2	1	1	0	0	0	0	2	0	12
23/4 - 17.3. K6	1	1	1	2	1	1	0	1	1	0	4	1	1245
23/4 - 17.3. K7	1	1	1	2	1	1	0	1	1	0	4	1	1245
23/4 - 17.3. K8	1	1	1	2	1	1	0	1	1	0	4	1	1245
23/4 - 17.3. K9	1	1	1	2	1	1	0	1	1	0	4	1	1245
23/4 - 17.3. K10	1	1	1	2	1	1	0	1	1	0	4	1	1245
23/4 - 17.3. K11	1	1	1	2	0	1	0	0	0	0	1	0	2
23/4 - 17.3. K12	1	1	1	2	0	0	0	0	0	0	0	0
23/4 - 17.3. K13	1	1	1	2	0	0	0	0	0	0	0	0
23/4 - 17.3. K14	1	1	1	2	0	1	0	0	0	0	1	0	2
23/4 - 17.3. K15	1	1	1	2	0	0	0	0	0	0	0	0
23/4 - 17.3. K17	1	1	1	2	0	0	0	0	0	0	0	0
23/4 - 17.3. K18	1	1	1	2	0	1	0	0	0	0	1	0	2
23/4 - 17.3. K19	1	1	1	2	0	0	0	0	0	0	0	0
23/4 - 17.3. K20	1	1	1	2	0	0	0	0	0	0	0	0
23/4 - 17.3. K21	1	1	1	2	0	1	0	0	0	0	1	0	2
23/4 - 17.3. K22	1	1	1	2	0	0	0	0	0	0	0	0
22/8 - 17.3. K1	1	1	1	2	1	1	0	0	1	0	3	1	125
22/8 - 17.3. K2	1	1	1	2	1	1	0	0	1	0	3	1	125
22/8 - 17.3. K3	1	1	1	2	1	1	0	0	1	0	3	1	125
22/8 - 17.3. K4	1	1	1	2	1	1	0	0	1	0	3	1	125
22/8 - 17.3. K5	1	1	1	2	1	1	0	1	0	0	3	1	124
22/8 - 17.3. K6	1	1	1	2	1	1	0	0	1	0	3	1	125
22/8 - 17.3. K7	1	1	1	2	1	1	0	0	1	0	3	1	125
22/8 - 17.3. K8	1	1	1	2	1	1	0	0	1	0	3	1	125
22/8 - 17.3. K9	1	1	1	2	1	1	0	0	1	0	3	1	125
22/8 - 17.3. K10	1	1	1	2	1	1	0	0	1	0	3	1	125
22/8 - 17.3. K11	1	1	1	2	0	0	0	0	0	0	0	0
22/8 - 17.3. K12	1	1	1	2	0	0	0	0	0	0	0	0
22/8 - 17.3. K13	1	1	1	2	0	0	0	0	0	0	0	0
22/8 - 17.3. K14	1	1	1	2	0	0	0	0	0	0	0	0
22/8 - 17.3. K15	1	1	1	2	0	0	0	0	0	0	0	0
22/8 - 17.3. K16	1	1	1	2	0	0	0	0	0	0	0	0
22/8 - 17.3. K17	1	1	1	2	0	0	0	0	0	0	0	0
22/8 - 17.3. K18	1	1	1	2	0	0	0	0	0	0	0	0
22/8 - 17.3. K19	1	1	1	2	0	0	0	0	0	0	0	0
22/8 - 17.3. K20	1	1	1	2	0	0	0	0	0	0	0	0
22/8 - 17.3. K21	1	1	1	2	0	0	0	0	0	0	0	0
22/8 - 17.3. K22	1	1	1	2	0	0	0	0	0	0	0	0
24/3 - 17.3. K3	2	1	1	2	0	0	0	0	0	1	1	0	6
24/3 - 17.3. K4	2	1	1	2	0	1	0	1	1	0	3	1	245
24/3 - 17.3. K5	2	1	1	2	0	1	0	0	0	0	1	0	2
24/3 - 17.3. K6	2	1	1	2	0	1	0	1	1	0	3	1	245
24/3 - 17.3. K10	2	1	1	2	0	0	0	0	0	0	0	0
24/3 - 17.3. K11	2	1	1	2	0	0	0	0	0	0	0	0
24/3 - 17.3. K14	2	1	1	2	0	0	0	0	0	0	0	0
24/3 - 17.3. K16	2	1	1	2	0	0	0	0	0	0	0	0
24/3 - 17.3. K17	2	1	1	2	0	0	0	0	0	0	0	0
24/3 - 17.3. K18	2	1	1	2	0	0	0	0	0	0	0	0
24/3 - 17.3. K19	2	1	1	2	0	1	0	0	0	0	1	0	2
24/3 - 17.3. K20	2	1	1	2	0	0	0	0	0	0	0	0
24/3 - 17.3. K21	2	1	1	2	0	0	0	0	0	0	0	0
24/3 - 17.3. K22	2	1	1	2	0	0	0	0	0	0	0	0
23/12 - 17.3. K1	2	1	1	2	0	1	0	0	0	0	1	0	2
23/12 - 17.3. K2	2	1	1	2	0	1	0	0	0	0	1	0	2
23/12 - 17.3. K3	2	1	1	2	0	0	0	0	0	0	0	0
23/12 - 17.3. K4	2	1	1	2	0	1	0	0	0	0	1	0	2
23/12 - 17.3. K5	2	1	1	2	0	1	0	0	0	0	1	0	2
23/12 - 17.3. K6	2	1	1	2	0	1	0	0	0	0	1	0	2
23/12 - 17.3. K7	2	1	1	2	0	1	0	0	0	0	1	0	2
23/12 - 17.3. K8	2	1	1	2	0	1	0	0	0	0	1	0	2
23/12 - 17.3. K9	2	1	1	2	0	1	0	0	0	0	1	0	2
23/12 - 17.3. K10	2	1	1	2	0	1	0	0	0	0	1	0	2
23/12 - 17.3. K11	2	1	1	2	0	1	0	0	0	0	1	0	2
23/12 - 17.3. K12	2	1	1	2	0	1	0	0	0	0	1	0	2
23/12 - 17.3. K13	2	1	1	2	0	1	0	0	0	0	1	0	2
23/12 - 17.3. K14	2	1	1	2	0	1	0	0	0	0	1	0	2
23/12 - 17.3. K15	2	1	1	2	0	1	0	0	0	0	1	0	2
23/12 - 17.3. K16	2	1	1	2	0	1	0	0	0	0	1	0	2
23/12 - 17.3. K17	2	1	1	2	0	1	0	0	0	0	1	0	2
23/12 - 17.3. K18	2	1	1	2	0	1	0	0	0	0	1	0	2
23/12 - 17.3. K19	2	1	1	2	0	1	0	0	0	0	1	0	2
23/12 - 17.3. K20	2	1	1	2	0	1	0	0	0	0	1	0	2
23/12 - 17.3. K21	2	1	1	2	0	1	0	0	0	0	1	0	2
23/12 - 17.3. K22	2	1	1	2	0	1	0	0	0	0	1	0	2
23/7 - 17.3. K1	1	1	1	2	1	1	0	0	1	0	3	1	125
23/7 - 17.3. K2	1	1	1	2	1	1	0	0	1	0	3	1	125
23/7 - 17.3. K3	1	1	1	2	1	1	0	0	1	0	3	1	125
23/7 - 17.3. K4	1	1	1	2	1	1	0	0	1	0	3	1	125
23/7 - 17.3. K6	1	1	1	2	1	1	0	0	1	0	3	1	125
23/7 - 17.3. K7	1	1	1	2	1	1	0	0	1	0	3	1	125
23/7 - 17.3. K8	1	1	1	2	1	1	0	0	1	0	3	1	125
23/7 - 17.3. K9	1	1	1	2	1	1	0	0	1	0	3	1	125
23/7 - 17.3. K10	1	1	1	2	1	1	0	0	1	0	3	1	125
23/7 - 17.3. K11	1	1	1	2	0	0	0	0	0	0	0	0
23/7 - 17.3. K12	1	1	1	2	0	0	0	0	0	0	0	0
23/7 - 17.3. K13	1	1	1	2	0	0	0	0	0	0	0	0
23/7 - 17.3. K16	1	1	1	2	0	0	0	0	0	0	0	0
23/7 - 17.3. K17	1	1	1	2	0	0	0	0	0	0	0	0
23/7 - 17.3. K18	1	1	1	2	0	0	0	0	0	0	0	0
23/7 - 17.3. K19	1	1	1	2	0	0	0	0	0	0	0	0
23/7 - 17.3. K20	1	1	1	2	0	0	0	0	0	0	0	0
23/7 - 17.3. K21	1	1	1	2	0	0	0	0	0	0	0	0
23/7 - 17.3. K22	1	1	1	2	0	0	0	0	0	0	0	0
24/6 - 17.3. K1	2	1	1	2	1	0	0	0	0	0	1	0	1
24/6 - 17.3. K2	2	1	1	2	1	1	0	0	1	0	3	1	125
24/6 - 17.3. K3	2	1	1	2	0	0	0	0	0	1	1	0	6
24/6 - 17.3. K4	2	1	1	2	1	0	0	0	0	0	1	0	1
24/6 - 17.3. K5	2	1	1	2	1	0	0	0	0	0	1	0	1
24/6 - 17.3. K6	2	1	1	2	0	1	0	1	0	0	2	0	24
24/6 - 17.3. K7	2	1	1	2	0	1	0	1	0	0	2	0	24
24/6 - 17.3. K8	2	1	1	2	0	1	0	1	0	0	2	0	24
24/6 - 17.3. K9	2	1	1	2	1	1	0	0	1	0	3	1	125
24/6 - 17.3. K10	2	1	1	2	1	1	0	0	1	0	3	1	125
24/6 - 17.3. K12	2	1	1	2	1	0	0	0	0	0	1	0	1
24/6 - 17.3. K13	2	1	1	2	1	1	0	0	1	0	3	1	125
24/6 - 17.3. K15	2	1	1	2	0	1	0	0	0	0	1	0	2
24/6 - 17.3. K16	2	1	1	2	1	1	0	0	1	0	3	1	125
24/6 - 17.3. K17	2	1	1	2	1	1	0	0	1	0	3	1	125
24/6 - 17.3. K18	2	1	1	2	1	1	0	0	1	0	3	1	125
24/6 - 17.3. K19	2	1	1	2	1	1	0	0	1	0	3	1	125
24/6 - 17.3. K20	2	1	1	2	0	1	0	0	0	0	1	0	2
24/6 - 17.3. K21	2	1	1	2	0	1	0	0	0	0	1	0	2
24/6 - 17.3. K22	2	1	1	2	0	1	0	0	0	0	1	0	2
24/11 -17.3. K1	2	1	1	2	1	1	0	0	1	0	3	1	125
24/11 -17.3. K2	2	1	1	2	1	1	0	1	1	0	4	1	1245
24/11 -17.3. K3	2	1	1	2	1	1	0	1	1	0	4	1	1245
24/11 -17.3. K4	2	1	1	2	1	1	0	1	1	0	4	1	1245
24/11 -17.3. K5	2	1	1	2	0	0	0	0	0	1	1	0	6
24/11 -17.3. K6	2	1	1	2	0	0	0	0	0	1	1	0	6
24/11 -17.3. K7	2	1	1	2	0	1	0	1	0	0	2	0	24
24/11 -17.3. K8	2	1	1	2	0	1	0	1	0	0	2	0	24
24/11 -17.3. K9	2	1	1	2	0	1	0	1	1	0	3	1	245
24/11 -17.3. K10	2	1	1	2	0	1	0	1	1	0	3	1	245
24/11 -17.3. K16	2	1	1	2	0	1	0	1	0	0	2	0	24
24/11 -17.3. K17	2	1	1	2	0	0	0	0	0	0	0	0
24/11 -17.3. K18	2	1	1	2	0	0	0	0	0	0	0	0
24/11 -17.3. K19	2	1	1	2	0	0	0	0	0	0	0	0
24/11 -17.3. K20	2	1	1	2	0	0	0	0	0	0	0	0
24/11 -17.3. K21	2	1	1	2	0	0	0	0	0	0	0	0
24/11 -17.3. K22	2	1	1	2	0	0	0	0	0	0	0	0
24/4 - 17.3. K1	2	1	1	2	1	1	0	0	1	0	3	1	125
24/4 - 17.3. K2	2	1	1	2	0	1	0	1	0	0	2	0	24
24/4 - 17.3. K3	2	1	1	2	0	1	0	1	0	0	2	0	24
24/4 - 17.3. K4	2	1	1	2	0	1	0	0	0	0	1	0	2
24/4 - 17.3. K5	2	1	1	2	0	1	0	0	0	0	1	0	2
24/4 - 17.3. K6	2	1	1	2	0	1	0	0	0	0	1	0	2
24/4 - 17.3. K7	2	1	1	2	0	1	0	0	0	0	1	0	2
24/4 - 17.3. K8	2	1	1	2	0	1	0	0	0	0	1	0	2
24/4 - 17.3. K9	2	1	1	2	0	1	0	0	0	0	1	0	2
24/4 - 17.3. K10	2	1	1	2	0	0	0	0	0	0	0	0
24/4 - 17.3. K11	2	1	1	2	0	1	0	0	0	0	1	0	2
24/4 - 17.3. K12	2	1	1	2	0	1	0	0	0	0	1	0	2
24/4 - 17.3. K13	2	1	1	2	0	1	0	0	0	0	1	0	2
24/4 - 17.3. K14	2	1	1	2	0	1	0	0	0	0	1	0	2
24/4 - 17.3. K15	2	1	1	2	0	1	0	0	0	0	1	0	2
24/4 - 17.3. K16	2	1	1	2	0	1	0	0	0	0	1	0	2
24/4 - 17.3. K17	2	1	1	2	0	1	0	0	0	0	1	0	2
24/4 - 17.3. K18	2	1	1	2	0	0	0	0	0	0	0	0
24/4 - 17.3. K19	2	1	1	2	0	1	0	0	0	0	1	0	2
24/4 - 17.3. K20	2	1	1	2	0	1	0	0	0	0	1	0	2
24/4 - 17.3. K21	2	1	1	2	0	1	0	0	0	0	1	0	2
24/4 - 17.3. K22	2	1	1	2	0	0	0	0	0	0	0	0
24/10 - 17.3. K1	2	1	1	2	1	1	0	0	1	0	3	1	125
24/10 - 17.3. K2	2	1	1	2	1	1	0	0	1	0	3	1	125
24/10 - 17.3. K3	2	1	1	2	0	1	0	0	0	0	1	0	2
24/10 - 17.3. K4	2	1	1	2	1	1	0	1	1	0	4	1	1245
24/10 - 17.3. K5	2	1	1	2	1	0	0	0	0	0	1	0	1
24/10 - 17.3. K6	2	1	1	2	0	0	0	0	0	1	1	0	6
24/10 - 17.3. K7	2	1	1	2	0	1	0	1	0	0	2	0	24
24/10 - 17.3. K8	2	1	1	2	0	1	0	1	0	0	2	0	24
24/10 - 17.3. K9	2	1	1	2	1	1	0	1	1	0	4	1	1245
24/10 - 17.3. K10	2	1	1	2	1	1	0	0	1	0	3	1	125
24/10 - 17.3. K11	2	1	1	2	0	0	0	0	0	1	1	0	6
24/10 - 17.3. K12	2	1	1	2	0	0	0	0	0	1	1	0	6
24/10 - 17.3. K13	2	1	1	2	1	1	0	0	1	0	3	1	125
24/10 - 17.3. K14	2	1	1	2	0	1	0	1	0	0	2	0	24
24/10 - 17.3. K15	2	1	1	2	0	1	0	0	0	0	1	0	2
24/10 - 17.3. K16	2	1	1	2	0	1	0	0	0	0	1	0	2
24/10 - 17.3. K17	2	1	1	2	0	1	0	0	0	0	1	0	2
24/10 - 17.3. K18	2	1	1	2	1	1	0	0	1	0	3	1	125
24/10 - 17.3. K19	2	1	1	2	0	1	0	0	0	0	1	0	2
24/10 - 17.3. K20	2	1	1	2	0	1	0	1	0	0	2	0	24
24/10 - 17.3. K21	2	1	1	2	1	1	0	0	1	0	3	1	125
24/10 - 17.3. K22	2	1	1	2	0	1	0	1	0	0	2	0	24
24/5 - 17.3. K1	1	1	1	2	1	0	0	0	0	0	1	0	1
24/5 - 17.3. K2	1	1	1	2	1	1	0	1	1	0	4	1	1245
24/5 - 17.3. K3	1	1	1	2	0	0	0	0	0	0	0	0
24/5 - 17.3. K4	1	1	1	2	1	1	0	1	1	0	4	1	1245
24/5 - 17.3. K5	1	1	1	2	1	1	0	1	1	0	4	1	1245
24/5 - 17.3. K6	1	1	1	2	1	1	0	1	1	0	4	1	1245
24/5 - 17.3. K7	1	1	1	2	1	1	0	1	1	0	4	1	1245
24/5 - 17.3. K8	1	1	1	2	1	1	0	1	1	0	4	1	1245
24/5 - 17.3. K9	1	1	1	2	1	1	0	1	1	0	4	1	1245
24/5 - 17.3. K10	1	1	1	2	1	1	0	1	1	0	4	1	1245
24/5 - 17.3. K11	1	1	1	2	0	0	0	0	0	0	0	0
24/5 - 17.3. K12	1	1	1	2	0	0	0	0	0	0	0	0
24/5 - 17.3. K13	1	1	1	2	0	0	0	0	0	0	0	0
24/5 - 17.3. K14	1	1	1	2	0	0	0	0	0	0	0	0
24/5 - 17.3. K16	1	1	1	2	0	0	0	0	0	0	0	0
24/5 - 17.3. K17	1	1	1	2	0	0	0	0	0	0	0	0
24/5 - 17.3. K18	1	1	1	2	0	0	0	0	0	0	0	0
24/5 - 17.3. K19	1	1	1	2	0	0	0	0	0	0	0	0
24/5 - 17.3. K20	1	1	1	2	0	0	0	0	0	0	0	0
24/5 - 17.3. K21	1	1	1	2	0	0	0	0	0	0	0	0
24/5 - 17.3. K22	1	1	1	2	0	0	0	0	0	0	0	0
22/9 - 17.3. K2	1	1	1	2	0	0	0	0	0	0	0	0
22/9 - 17.3. K3	1	1	1	2	0	0	0	0	0	0	0	0
22/9 - 17.3. K4	1	1	1	2	0	0	0	0	0	0	0	0
22/9 - 17.3. K5	1	1	1	2	0	0	0	0	0	0	0	0
22/9 - 17.3. K6	1	1	1	2	0	0	0	0	0	0	0	0
22/9 - 17.3. K7	1	1	1	2	0	0	0	0	0	0	0	0
22/9 - 17.3. K8	1	1	1	2	0	0	0	0	0	0	0	0
22/9 - 17.3. K9	1	1	1	2	0	0	0	0	0	0	0	0
22/9 - 17.3. K10	1	1	1	2	0	0	0	0	0	0	0	0
22/9 - 17.3. K11	1	1	1	2	0	0	0	0	0	0	0	0
22/9 - 17.3. K12	1	1	1	2	0	0	0	0	0	0	0	0
22/9 - 17.3. K13	1	1	1	2	0	0	0	0	0	0	0	0
22/9 - 17.3. K14	1	1	1	2	0	0	0	0	0	0	0	0
22/9 - 17.3. K15	1	1	1	2	0	0	0	0	0	0	0	0
22/9 - 17.3. K16	1	1	1	2	0	0	0	0	0	0	0	0
22/9 - 17.3. K17	1	1	1	2	0	0	0	0	0	0	0	0
22/9 - 17.3. K18	1	1	1	2	0	0	0	0	0	0	0	0
22/9 - 17.3. K19	1	1	1	2	0	0	0	0	0	0	0	0
22/9 - 17.3. K20	1	1	1	2	0	0	0	0	0	0	0	0
22/9 - 17.3. K21	1	1	1	2	0	0	0	0	0	0	0	0
22/9 - 17.3. K22	1	1	1	2	0	0	0	0	0	0	0	0
27/1 -17.3. K1	2	1	1	2	1	1	0	0	1	0	3	1	125
27/1 -17.3. K2	2	1	1	2	1	1	0	0	1	0	3	1	125
27/1 -17.3. K3	2	1	1	2	1	1	0	0	1	0	3	1	125
27/1 -17.3. K4	2	1	1	2	1	1	0	0	1	0	3	1	125
27/1 -17.3. K5	2	1	1	2	1	1	0	0	1	0	3	1	125
27/1 -17.3. K6	2	1	1	2	0	1	0	0	1	0	2	0	25
27/1 -17.3. K7	2	1	1	2	1	1	0	0	1	0	3	1	125
27/1 -17.3. K8	2	1	1	2	1	1	0	0	1	0	3	1	125
27/1 -17.3. K9	2	1	1	2	1	1	0	0	1	0	3	1	125
27/1 -17.3. K10	2	1	1	2	1	1	0	0	1	0	3	1	125
27/1 -17.3. K11	2	1	1	2	1	1	0	0	1	0	3	1	125
27/1 -17.3. K12	2	1	1	2	1	1	0	0	1	0	3	1	125
27/1 -17.3. K13	2	1	1	2	1	1	0	0	1	0	3	1	125
27/1 -17.3. K14	2	1	1	2	1	1	0	0	1	0	3	1	125
27/1 -17.3. K15	2	1	1	2	1	1	0	0	1	0	3	1	125
27/1 -17.3. K16	2	1	1	2	1	1	0	0	1	0	3	1	125
27/1 -17.3. K17	2	1	1	2	1	1	0	0	1	0	3	1	125
27/1 -17.3. K18	2	1	1	2	1	1	0	0	1	0	3	1	125
27/1 -17.3. K19	2	1	1	2	1	1	0	0	1	0	3	1	125
27/1 -17.3. K20	2	1	1	2	1	1	0	0	1	0	3	1	125
27/1 -17.3. K21	2	1	1	2	1	1	0	0	1	0	3	1	125
27/1 -17.3. K22	2	1	1	2	1	1	0	0	1	0	3	1	125
27/9 - 17.3. K2	2	1	1	2	1	1	0	1	1	0	4	1	1245
27/9 - 17.3. K3	2	1	1	2	1	1	0	1	1	0	4	1	1245
27/9 - 17.3. K4	2	1	1	2	1	1	0	1	1	0	4	1	1245
27/9 - 17.3. K5	2	1	1	2	1	1	0	1	1	0	4	1	1245
27/9 - 17.3. K6	2	1	1	2	0	0	0	0	0	1	1	0	6
27/9 - 17.3. K7	2	1	1	2	1	1	0	1	1	0	4	1	1245
27/9 - 17.3. K8	2	1	1	2	1	1	0	1	1	0	4	1	1245
27/9 - 17.3. K9	2	1	1	2	1	1	0	1	1	0	4	1	1245
27/9 - 17.3. K10	2	1	1	2	1	1	0	0	1	0	3	1	125
27/9 - 17.3. K11	2	1	1	2	0	0	0	0	0	0	0	0
27/9 - 17.3. K12	2	1	1	2	0	0	0	0	0	0	0	0
27/9 - 17.3. K13	2	1	1	2	0	0	0	0	0	0	0	0
27/9 - 17.3. K14	2	1	1	2	0	0	0	0	0	0	0	0
27/9 - 17.3. K15	2	1	1	2	0	0	0	0	0	0	0	0
27/9 - 17.3. K16	2	1	1	2	0	0	0	0	0	0	0	0
27/9 - 17.3. K17	2	1	1	2	0	0	0	0	0	0	0	0
27/9 - 17.3. K18	2	1	1	2	0	0	0	0	0	0	0	0
27/9 - 17.3. K19	2	1	1	2	0	0	0	0	0	0	0	0
27/9 - 17.3. K20	2	1	1	2	0	0	0	0	0	0	0	0
27/9 - 17.3. K21	2	1	1	2	0	0	0	0	0	0	0	0
27/9 - 17.3. K22	2	1	1	2	0	0	0	0	0	0	0	0
27/4 - 17.3. K3	1	1	1	2	0	1	0	0	0	0	1	0	2
27/4 - 17.3. K4	1	1	1	2	0	0	0	0	0	0	0	0
27/4 - 17.3. K5	1	1	1	2	0	0	0	0	0	1	1	0	6
27/4 - 17.3. K6	1	1	1	2	0	1	0	1	0	0	2	0	24
27/4 - 17.3. K7	1	1	1	2	0	1	0	1	1	0	3	1	245
27/4 - 17.3. K8	1	1	1	2	1	1	0	0	1	0	3	1	125
27/4 - 17.3. K10	1	1	1	2	1	1	0	0	1	0	3	1	125
27/4 - 17.3. K11	1	1	1	2	0	1	0	0	0	0	1	0	2
27/4 - 17.3. K12	1	1	1	2	0	0	0	0	0	0	0	0
27/4 - 17.3. K13	1	1	1	2	0	0	0	0	0	0	0	0
27/4 - 17.3. K14	1	1	1	2	0	1	0	0	0	0	1	0	2
27/4 - 17.3. K16	1	1	1	2	0	1	0	0	0	0	1	0	2
27/4 - 17.3. K17	1	1	1	2	0	0	0	0	0	0	0	0
27/4 - 17.3. K18	1	1	1	2	0	1	0	0	0	0	1	0	2
27/4 - 17.3. K19	1	1	1	2	0	1	0	0	0	0	1	0	2
27/4 - 17.3. K20	1	1	1	2	1	1	0	0	1	0	3	1	125
27/4 - 17.3. K21	1	1	1	2	0	1	0	0	0	0	1	0	2
27/4 - 17.3. K22	1	1	1	2	0	1	0	0	0	0	1	0	2
24/12 - 17.3. K1	1	1	1	2	1	0	0	0	1	0	2	0	15
24/12 - 17.3. K2	1	1	1	2	1	1	0	0	1	0	3	1	125
24/12 - 17.3. K3	1	1	1	2	1	0	0	0	1	0	2	0	15
24/12 - 17.3. K4	1	1	1	2	0	1	0	1	0	0	2	0	24
24/12 - 17.3. K5	1	1	1	2	1	1	0	1	1	0	4	1	1245
24/12 - 17.3. K6	1	1	1	2	0	1	0	1	0	0	2	0	24
24/12 - 17.3. K7	1	1	1	2	1	1	0	1	1	0	4	1	1245
24/12 - 17.3. K8	1	1	1	2	1	1	0	1	1	0	4	1	1245
24/12 - 17.3. K9	1	1	1	2	1	0	0	0	1	0	2	0	15
24/12 - 17.3. K10	1	1	1	2	1	1	0	0	1	0	3	1	125
24/12 - 17.3. K11	1	1	1	2	0	0	0	0	0	0	0	0
24/12 - 17.3. K17	1	1	1	2	1	0	0	0	1	0	2	0	15
24/12 - 17.3. K18	1	1	1	2	0	0	0	0	0	0	0	0
24/12 - 17.3. K19	1	1	1	2	1	1	0	1	1	0	4	1	1245
24/12 - 17.3. K20	1	1	1	2	0	0	0	0	0	0	0	0
24/12 - 17.3. K21	1	1	1	2	1	0	0	0	1	0	2	0	15
24/12 - 17.3. K22	1	1	1	2	1	1	0	1	0	0	3	1	124
27/3 - 17.3. K2	1	1	1	2	1	1	0	0	1	0	3	1	125
27/3 - 17.3. K7	1	1	1	2	0	1	0	0	1	0	2	0	25
27/3 - 17.3. K8	1	1	1	2	0	1	0	1	1	0	3	1	245
27/3 - 17.3. K10	1	1	1	2	0	1	0	0	0	0	1	0	2
27/3 - 17.3. K12	1	1	1	2	0	1	0	0	0	0	1	0	2
27/3 - 17.3. K14	1	1	1	2	0	1	0	0	0	0	1	0	2
27/3 - 17.3. K15	1	1	1	2	0	1	0	0	0	0	1	0	2
27/3 - 17.3. K16	1	1	1	2	0	1	0	0	0	0	1	0	2
27/3 - 17.3. K17	1	1	1	2	0	1	0	0	0	0	1	0	2
27/3 - 17.3. K18	1	1	1	2	0	1	0	0	0	0	1	0	2
27/3 - 17.3. K19	1	1	1	2	0	1	0	0	0	0	1	0	2
27/3 - 17.3. K20	1	1	1	2	0	1	0	0	0	0	1	0	2
27/3 - 17.3. K21	1	1	1	2	0	1	0	0	0	0	1	0	2
27/3 - 17.3. K22	1	1	1	2	0	1	0	0	0	0	1	0	2
18/1 - 20.3. K1	1	1	1	2	1	1	0	0	1	0	3	1	125
18/1 - 20.3. K2	1	1	1	2	1	1	0	1	1	0	4	1	1245
18/1 - 20.3. K3	1	1	1	2	1	1	0	1	1	0	4	1	1245
18/1 - 20.3. K4	1	1	1	2	1	1	0	0	1	0	3	1	125
18/1 - 20.3. K5	1	1	1	2	1	1	0	0	1	0	3	1	125
18/1 - 20.3. K6	1	1	1	2	1	1	0	0	1	0	3	1	125
18/1 - 20.3. K7	1	1	1	2	1	1	0	1	1	0	4	1	1245
18/1 - 20.3. K8	1	1	1	2	1	1	0	1	1	0	4	1	1245
18/1 - 20.3. K9	1	1	1	2	1	1	0	0	1	0	3	1	125
18/1 - 20.3. K10	1	1	1	2	1	1	0	0	1	0	3	1	125
18/1 - 20.3. K11	1	1	1	2	0	0	0	0	0	0	0	0
18/1 - 20.3. K12	1	1	1	2	0	0	0	0	0	0	0	0
18/1 - 20.3. K13	1	1	1	2	0	0	0	0	0	0	0	0
18/1 - 20.3. K14	1	1	1	2	0	0	0	0	0	0	0	0
18/1 - 20.3. K15	1	1	1	2	0	0	0	0	0	0	0	0
18/1 - 20.3. K16	1	1	1	2	0	0	0	0	0	0	0	0
18/1 - 20.3. K17	1	1	1	2	0	0	0	0	0	0	0	0
18/1 - 20.3. K18	1	1	1	2	0	0	0	0	0	0	0	0
18/1 - 20.3. K19	1	1	1	2	0	0	0	0	0	0	0	0
18/1 - 20.3. K20	1	1	1	2	0	0	0	0	0	0	0	0
18/1 - 20.3. K21	1	1	1	2	0	0	0	0	0	0	0	0
18/1 - 20.3. K22	1	1	1	2	0	0	0	0	0	0	0	0
18/4 - 20.3. K1	1	1	1	2	1	1	0	0	1	0	3	1	125
18/4 - 20.3. K2	1	1	1	2	1	1	0	0	1	0	3	1	125
18/4 - 20.3. K3	1	1	1	2	1	1	0	0	1	0	3	1	125
18/4 - 20.3. K4	1	1	1	2	1	1	0	0	1	0	3	1	125
18/4 - 20.3. K5	1	1	1	2	0	1	0	0	0	0	1	0	2
18/4 - 20.3. K6	1	1	1	2	0	1	0	0	0	0	1	0	2
18/4 - 20.3. K7	1	1	1	2	0	1	0	0	0	0	1	0	2
18/4 - 20.3. K8	1	1	1	2	1	1	0	0	1	0	3	1	125
18/4 - 20.3. K9	1	1	1	2	1	1	0	0	1	0	3	1	125
18/4 - 20.3. K10	1	1	1	2	1	1	0	0	1	0	3	1	125
18/4 - 20.3. K11	1	1	1	2	0	0	0	0	0	0	0	0
18/4 - 20.3. K12	1	1	1	2	0	1	0	0	0	0	1	0	2
18/4 - 20.3. K13	1	1	1	2	0	0	0	0	0	0	0	0
18/4 - 20.3. K14	1	1	1	2	0	1	0	0	0	0	1	0	2
18/4 - 20.3. K15	1	1	1	2	0	1	0	0	0	0	1	0	2
18/4 - 20.3. K16	1	1	1	2	0	1	0	0	0	0	1	0	2
18/4 - 20.3. K17	1	1	1	2	0	0	0	0	0	0	0	0
18/4 - 20.3. K18	1	1	1	2	0	1	0	0	0	0	1	0	2
18/4 - 20.3. K19	1	1	1	2	0	0	0	0	0	0	0	0
18/4 - 20.3. K20	1	1	1	2	0	0	0	0	0	0	0	0
18/4 - 20.3. K21	1	1	1	2	0	0	0	0	0	0	0	0
18/4 - 20.3. K22	1	1	1	2	0	1	0	0	0	0	1	0	2
20/3 - 20.3. K1	2	1	0	2
20/3 - 20.3. K2	2	1	0	2
20/3 - 20.3. K3	2	1	0	2
20/3 - 20.3. K4	2	1	0	2
20/3 - 20.3. K5	2	1	0	2
20/3 - 20.3. K6	2	1	0	2
20/3 - 20.3. K7	2	1	0	2
20/3 - 20.3. K8	2	1	1	2	0	1	0	1	1	0	3	1	245
20/3 - 20.3. K9	2	1	0	2
20/3 - 20.3. K10	2	1	0	2
20/3 - 20.3. K12	2	1	1	2	0	0	0	0	0	0	0	0
20/3 - 20.3. K15	2	1	0	2
20/3 - 20.3. K16	2	1	0	2
20/3 - 20.3. K17	2	1	1	2	0	0	0	0	0	0	0	0
20/3 - 20.3. K18	2	1	1	2	0	1	0	0	0	0	1	0	2
20/3 - 20.3. K20	2	1	0	2
20/3 - 20.3. K21	2	1	1	2	0	1	0	0	0	0	1	0	2
20/3 - 20.3. K22	2	1	1	2	0	1	0	0	0	0	1	0	2
22/5 - 20.3. K1	2	1	1	2	1	1	0	0	1	0	3	1	125
22/5 - 20.3. K2	2	1	1	2	1	0	1	0	1	0	3	1	135
22/5 - 20.3. K3	2	1	1	2	1	1	0	0	1	0	3	1	125
22/5 - 20.3. K4	2	1	1	2	1	0	0	0	1	0	2	0	15
22/5 - 20.3. K5	2	1	1	2	0	0	0	0	1	0	1	0	5
22/5 - 20.3. K6	2	1	1	2	0	0	0	0	1	0	1	0	5
22/5 - 20.3. K7	2	1	1	2	1	1	0	0	1	0	3	1	125
22/5 - 20.3. K8	2	1	1	2	0	0	0	0	1	0	1	0	5
22/5 - 20.3. K9	2	1	1	2	0	0	0	0	1	0	1	0	5
22/5 - 20.3. K10	2	1	1	2	0	1	0	0	0	0	1	0	2
22/5 - 20.3. K11	2	1	1	2	0	1	0	0	0	0	1	0	2
22/5 - 20.3. K12	2	1	1	2	0	0	0	0	0	0	0	0
22/5 - 20.3. K13	2	1	1	2	0	1	0	0	0	0	1	0	2
22/5 - 20.3. K14	2	1	1	2	0	1	0	0	0	0	1	0	2
22/5 - 20.3. K15	2	1	1	2	0	1	0	0	0	0	1	0	2
22/5 - 20.3. K16	2	1	1	2	0	1	0	0	0	0	1	0	2
22/5 - 20.3. K17	2	1	1	2	0	0	0	0	0	0	0	0
22/5 - 20.3. K18	2	1	1	2	0	1	0	0	0	0	1	0	2
22/5 - 20.3. K19	2	1	1	2	0	0	0	0	0	0	0	0
22/5 - 20.3. K20	2	1	1	2	0	0	0	0	0	0	0	0
22/5 - 20.3. K21	2	1	1	2	0	0	0	0	1	0	1	0	5
22/5 - 20.3. K22	2	1	1	2	0	1	0	0	0	0	1	0	2
20/1 - 20.3. K1	1	1	1	2	1	1	0	0	1	0	3	1	125
20/1 - 20.3. K3	1	1	1	2	1	1	0	0	1	0	3	1	125
20/1 - 20.3. K4	1	1	1	2	1	1	0	0	1	0	3	1	125
20/1 - 20.3. K5	1	1	1	2	0	1	0	1	1	0	3	1	245
20/1 - 20.3. K6	1	1	1	2	0	1	0	1	1	0	3	1	245
20/1 - 20.3. K7	1	1	1	2	0	1	0	1	1	0	3	1	245
20/1 - 20.3. K8	1	1	1	2	0	1	0	0	1	0	2	0	25
20/1 - 20.3. K9	1	1	1	2	1	1	0	0	1	0	3	1	125
20/1 - 20.3. K10	1	1	1	2	1	1	0	0	1	0	3	1	125
20/1 - 20.3. K14	1	1	0	2
20/1 - 20.3. K15	1	1	0	2
20/1 - 20.3. K16	1	1	1	2	0	0	0	0	0	0	0	0
20/1 - 20.3. K17	1	1	1	2	0	0	0	0	0	0	0	0
20/1 - 20.3. K18	1	1	0	2
20/1 - 20.3. K19	1	1	1	2	1	1	0	0	1	0	3	1	125
20/1 - 20.3. K20	1	1	1	2	1	1	0	0	1	0	3	1	125
20/1 - 20.3. K21	1	1	1	2	1	1	0	0	1	0	3	1	125
20/1 - 20.3. K22	1	1	1	2	1	1	0	0	1	0	3	1	125
23/8 - 20.3. K1	2	1	0	2
23/8 - 20.3. K2	2	1	0	2
23/8 - 20.3. K3	2	1	0	2
23/8 - 20.3. K4	2	1	1	2	1	1	0	1	1	0	4	1	1245
23/8 - 20.3. K5	2	1	1	2	0	1	0	1	0	0	2	0	24
23/8 - 20.3. K6	2	1	1	2	0	1	0	1	0	0	2	0	24
23/8 - 20.3. K7	2	1	1	2	1	0	0	0	1	0	2	0	15
23/8 - 20.3. K8	2	1	1	2	1	0	0	0	1	0	2	0	15
23/8 - 20.3. K9	2	1	1	2	1	1	0	1	1	0	4	1	1245
23/8 - 20.3. K10	2	1	1	2	0	0	0	0	0	0	0	0
23/8 - 20.3. K11	2	1	1	2	0	0	0	0	0	0	0	0
23/8 - 20.3. K12	2	1	1	2	0	0	0	0	0	0	0	0
23/8 - 20.3. K13	2	1	1	2	0	0	0	0	0	0	0	0
23/8 - 20.3. K14	2	1	1	2	0	1	0	0	1	0	2	0	25
23/8 - 20.3. K15	2	1	1	2	0	0	0	0	0	0	0	0
23/8 - 20.3. K16	2	1	1	2	0	0	0	0	0	0	0	0
23/8 - 20.3. K17	2	1	1	2	0	0	0	0	0	0	0	0
23/8 - 20.3. K18	2	1	1	2	0	0	0	0	0	0	0	0
23/8 - 20.3. K19	2	1	1	2	0	0	0	0	0	0	0	0
23/8 - 20.3. K20	2	1	1	2	0	0	0	0	0	0	0	0
23/8 - 20.3. K21	2	1	1	2	0	0	0	0	0	0	0	0
23/8 - 20.3. K22	2	1	1	2	0	0	0	0	0	0	0	0
23/1 - 20.3. K1	1	1	0	2
23/1 - 20.3. K2	1	1	0	2
23/1 - 20.3. K3	1	1	0	2
23/1 - 20.3. K4	1	1	1	2	1	0	0	0	1	0	2	0	15
23/1 - 20.3. K5	1	1	1	2	0	0	0	0	0	0	0	0
23/1 - 20.3. K6	1	1	1	2	0	0	0	0	0	0	0	0
23/1 - 20.3. K7	1	1	1	2	0	0	0	0	0	0	0	0
23/1 - 20.3. K9	1	1	1	2	0	0	0	0	0	0	0	0
23/1 - 20.3. K10	1	1	1	2	0	0	0	0	0	0	0	0
23/1 - 20.3. K11	1	1	1	2	0	0	0	0	0	0	0	0
23/1 - 20.3. K12	1	1	1	2	0	0	0	0	0	0	0	0
23/1 - 20.3. K13	1	1	1	2	0	0	0	0	0	0	0	0
23/1 - 20.3. K14	1	1	1	2	0	0	0	0	0	0	0	0
23/1 - 20.3. K15	1	1	1	2	0	0	0	0	0	0	0	0
23/1 - 20.3. K16	1	1	1	2	0	0	0	0	0	0	0	0
23/1 - 20.3. K18	1	1	1	2	0	0	0	0	0	0	0	0
23/1 - 20.3. K19	1	1	1	2	0	0	0	0	0	0	0	0
23/1 - 20.3. K20	1	1	1	2	0	0	0	0	0	0	0	0
23/1 - 20.3. K21	1	1	1	2	0	0	0	0	0	0	0	0
23/1 - 20.3. K22	1	1	1	2	0	0	0	0	0	0	0	0
22/6 - 20.3. K1	1	1	1	2	1	0	0	0	1	0	2	0	15
22/6 - 20.3. K2	1	1	1	2	1	0	0	0	1	0	2	0	15
22/6 - 20.3. K3	1	1	1	2	1	0	0	0	1	0	2	0	15
22/6 - 20.3. K4	1	1	1	2	1	0	0	0	1	0	2	0	15
22/6 - 20.3. K5	1	1	1	2	1	0	0	0	1	0	2	0	15
22/6 - 20.3. K6	1	1	1	2	1	0	0	0	1	0	2	0	15
22/6 - 20.3. K7	1	1	1	2	1	0	0	0	1	0	2	0	15
22/6 - 20.3. K8	1	1	1	2	1	0	0	0	1	0	2	0	15
22/6 - 20.3. K9	1	1	1	2	1	0	0	0	1	0	2	0	15
22/6 - 20.3. K10	1	1	1	2	1	0	0	0	1	0	2	0	15
22/6 - 20.3. K11	1	1	1	2	0	1	0	0	0	0	1	0	2
22/6 - 20.3. K12	1	1	1	2	0	1	0	0	0	0	1	0	2
22/6 - 20.3. K13	1	1	1	2	0	1	0	0	0	0	1	0	2
22/6 - 20.3. K14	1	1	1	2	0	1	0	0	0	0	1	0	2
22/6 - 20.3. K15	1	1	1	2	0	1	0	0	0	0	1	0	2
22/6 - 20.3. K16	1	1	1	2	0	1	0	0	0	0	1	0	2
22/6 - 20.3. K17	1	1	1	2	0	1	0	0	0	0	1	0	2
22/6 - 20.3. K18	1	1	1	2	0	1	0	0	0	0	1	0	2
22/6 - 20.3. K19	1	1	1	2	0	1	0	0	0	0	1	0	2
22/6 - 20.3. K20	1	1	1	2	0	1	0	0	0	0	1	0	2
22/6 - 20.3. K21	1	1	1	2	0	1	0	0	0	0	1	0	2
22/6 - 20.3. K22	1	1	1	2	0	1	0	0	0	0	1	0	2
23/5 - 20.3. K1	2	1	1	2	1	1	0	0	1	0	3	1	125
23/5 - 20.3. K2	2	1	1	2	1	1	0	0	1	0	3	1	125
23/5 - 20.3. K3	2	1	1	2	0	0	0	0	0	1	1	0	6
23/5 - 20.3. K4	2	1	1	2	0	1	0	1	1	0	3	1	245
23/5 - 20.3. K5	2	1	1	2	0	1	0	1	1	0	3	1	245
23/5 - 20.3. K6	2	1	1	2	1	1	0	0	1	0	3	1	125
23/5 - 20.3. K7	2	1	1	2	1	1	0	0	1	0	3	1	125
23/5 - 20.3. K8	2	1	1	2	1	1	0	0	1	0	3	1	125
23/5 - 20.3. K9	2	1	1	2	0	0	0	0	0	1	1	0	6
23/5 - 20.3. K10	2	1	1	2	0	0	0	0	0	1	1	0	6
23/5 - 20.3. K11	2	1	1	2	0	0	0	0	0	0	0	0
23/5 - 20.3. K12	2	1	1	2	0	0	0	0	0	0	0	0
23/5 - 20.3. K13	2	1	1	2	0	0	0	0	0	0	0	0
23/5 - 20.3. K14	2	1	1	2	0	0	0	0	0	0	0	0
23/5 - 20.3. K15	2	1	1	2	0	0	0	0	0	0	0	0
23/5 - 20.3. K16	2	1	1	2	0	0	0	0	0	0	0	0
23/5 - 20.3. K17	2	1	1	2	1	1	0	0	1	0	3	1	125
23/5 - 20.3. K18	2	1	1	2	0	0	0	0	0	0	0	0
23/5 - 20.3. K19	2	1	1	2	1	1	0	0	1	0	3	1	125
23/5 - 20.3. K20	2	1	1	2	0	1	0	1	1	0	3	1	245
23/5 - 20.3. K21	2	1	1	2	0	0	0	0	0	0	0	0
23/5 - 20.3. K22	2	1	1	2	0	1	0	1	1	0	3	1	245
23/9 - 20.3. K1	2	1	1	2	1	1	0	0	1	0	3	1	125
23/9 - 20.3. K3	2	1	1	2	0	1	0	0	1	0	2	0	25
23/9 - 20.3. K4	2	1	1	2	0	1	0	0	1	0	2	0	25
23/9 - 20.3. K5	2	1	1	2	1	1	0	1	1	0	4	1	1245
23/9 - 20.3. K6	2	1	1	2	1	1	0	1	1	0	4	1	1245
23/9 - 20.3. K7	2	1	1	2	1	1	0	1	1	0	4	1	1245
23/9 - 20.3. K8	2	1	1	2	1	1	0	0	1	0	3	1	125
23/9 - 20.3. K9	2	1	1	2	1	1	0	0	1	0	3	1	125
23/9 - 20.3. K10	2	1	1	2	0	0	0	0	0	0	0	0
23/9 - 20.3. K13	2	1	1	2	0	0	0	0	0	0	0	0
23/9 - 20.3. K17	2	1	1	2	0	0	0	0	0	0	0	0
23/9 - 20.3. K18	2	1	1	2	0	0	0	0	0	0	0	0
23/9 - 20.3. K19	2	1	1	2	0	1	0	0	0	0	1	0	2
23/9 - 20.3. K20	2	1	1	2	0	0	0	0	0	0	0	0
23/9 - 20.3. K21	2	1	1	2	0	0	0	0	0	0	0	0
23/9 - 20.3. K22	2	1	1	2	0	0	0	0	0	0	0	0
20/12 - 20.3. K1	1	1	1	2	1	1	0	0	1	0	3	1	125
20/12 - 20.3. K2	1	1	1	2	1	1	0	0	1	0	3	1	125
20/12 - 20.3. K3	1	1	1	2	1	1	0	0	1	0	3	1	125
20/12 - 20.3. K6	1	1	1	2	0	1	0	1	1	0	3	1	245
20/12 - 20.3. K7	1	1	1	2	0	1	0	1	1	0	3	1	245
20/12 - 20.3. K8	1	1	1	2	0	1	0	1	1	0	3	1	245
20/12 - 20.3. K9	1	1	1	2	1	1	0	0	1	0	3	1	125
20/12 - 20.3. K10	1	1	1	2	1	1	0	0	1	0	3	1	125
20/12 - 20.3. K11	1	1	1	2	1	1	0	0	1	0	3	1	125
20/12 - 20.3. K13	1	1	1	2	1	1	0	0	1	0	3	1	125
20/12 - 20.3. K14	1	1	1	2	1	1	0	0	1	0	3	1	125
20/12 - 20.3. K15	1	1	1	2	1	1	0	0	1	0	3	1	125
20/12 - 20.3. K16	1	1	1	2	1	1	0	0	1	0	3	1	125
20/12 - 20.3. K17	1	1	1	2	1	1	0	0	1	0	3	1	125
20/12 - 20.3. K18	1	1	1	2	1	1	0	0	1	0	3	1	125
20/12 - 20.3. K19	1	1	1	2	1	1	0	0	1	0	3	1	125
20/12 - 20.3. K20	1	1	1	2	1	1	0	0	1	0	3	1	125
20/12 - 20.3. K21	1	1	1	2	1	1	0	0	1	0	3	1	125
20/12 - 20.3. K22	1	1	1	2	1	1	0	0	1	0	3	1	125
20/12 - 20.3. K25	1	1	1	2	1	1	0	0	1	0	3	1	125
20/12 - 20.3. K26	1	1	1	2	1	1	0	0	1	0	3	1	125
23/6 - 20.3. K1	2	1	1	2	1	1	0	0	0	0	2	0	12
23/6 - 20.3. K2	2	1	1	2	1	1	0	0	1	0	3	1	125
23/6 - 20.3. K3	2	1	1	2	1	0	0	0	0	0	1	0	1
23/6 - 20.3. K4	2	1	1	2	1	1	0	0	0	0	2	0	12
23/6 - 20.3. K5	2	1	1	2	1	1	0	0	0	0	2	0	12
23/6 - 20.3. K6	2	1	1	2	1	1	0	0	0	0	2	0	12
23/6 - 20.3. K7	2	1	1	2	0	1	0	1	1	0	3	1	245
23/6 - 20.3. K8	2	1	1	2	0	1	0	1	1	0	3	1	245
23/6 - 20.3. K9	2	1	1	2	0	1	0	1	1	0	3	1	245
23/6 - 20.3. K13	2	1	1	2	0	0	0	0	0	0	0	0
23/6 - 20.3. K14	2	1	1	2	0	0	0	0	0	0	0	0
23/6 - 20.3. K15	2	1	1	2	0	0	0	0	0	0	0	0
23/6 - 20.3. K16	2	1	1	2	0	0	0	0	0	0	0	0
23/6 - 20.3. K17	2	1	1	2	0	0	0	0	0	0	0	0
23/6 - 20.3. K18	2	1	1	2	0	0	0	0	0	0	0	0
23/6 - 20.3. K19	2	1	1	2	0	0	0	0	0	0	0	0
23/6 - 20.3. K20	2	1	1	2	0	0	0	0	0	0	0	0
23/6 - 20.3. K21	2	1	1	2	0	0	0	0	0	0	0	0
23/6 - 20.3. K22	2	1	1	2	0	0	0	0	0	0	0	0
23/10 - 20.3. K1	2	1	1	2	1	1	0	0	0	0	2	0	12
23/10 - 20.3. K2	2	1	1	2	1	1	0	0	0	0	2	0	12
23/10 - 20.3. K3	2	1	1	2	1	1	0	0	0	0	2	0	12
23/10 - 20.3. K4	2	1	1	2	1	1	0	0	0	0	2	0	12
23/10 - 20.3. K5	2	1	1	2	1	1	0	0	0	0	2	0	12
23/10 - 20.3. K6	2	1	1	2	1	1	0	0	0	0	2	0	12
23/10 - 20.3. K7	2	1	1	2	0	1	0	1	1	0	3	1	245
23/10 - 20.3. K8	2	1	1	2	0	0	0	1	1	0	2	0	45
23/10 - 20.3. K9	2	1	1	2	0	1	0	1	1	0	3	1	245
23/10 - 20.3. K10	2	1	1	2	0	0	0	0	0	0	0	0
23/10 - 20.3. K11	2	1	1	2	0	0	0	0	0	0	0	0
23/10 - 20.3. K12	2	1	1	2	0	0	0	0	0	0	0	0
23/10 - 20.3. K13	2	1	1	2	0	0	0	0	0	0	0	0
23/10 - 20.3. K14	2	1	1	2	0	0	0	0	0	0	0	0
23/10 - 20.3. K15	2	1	1	2	0	0	0	0	0	0	0	0
23/10 - 20.3. K16	2	1	1	2	0	0	0	0	0	0	0	0
23/10 - 20.3. K17	2	1	1	2	0	0	0	0	0	0	0	0
23/10 - 20.3. K18	2	1	1	2	0	0	0	0	0	0	0	0
23/10 - 20.3. K19	2	1	1	2	0	0	0	0	0	0	0	0
23/10 - 20.3. K20	2	1	1	2	0	0	0	0	0	0	0	0
23/10 - 20.3. K21	2	1	1	2	0	0	0	0	0	0	0	0
23/10 - 20.3. K25	2	1	1	2	0	0	0	0	0	0	0	0
23/10 - 20.3. K27	2	1	1	2	0	0	0	0	0	0	0	0
23/3 - 20.3. K1	1	1	1	2	1	1	0	0	1	0	3	1	125
23/3 - 20.3. K2	1	1	1	2	1	1	0	1	1	0	4	1	1245
23/3 - 20.3. K3	1	1	1	2	1	1	0	0	1	0	3	1	125
23/3 - 20.3. K4	1	1	1	2	1	1	0	1	1	0	4	1	1245
23/3 - 20.3. K5	1	1	1	2	1	1	0	0	1	0	3	1	125
23/3 - 20.3. K6	1	1	1	2	1	1	0	0	1	0	3	1	125
23/3 - 20.3. K7	1	1	1	2	0	0	0	0	0	0	0	0
23/3 - 20.3. K8	1	1	1	2	0	0	0	0	0	0	0	0
23/3 - 20.3. K9	1	1	1	2	0	0	0	0	0	0	0	0
23/3 - 20.3. K11	1	1	1	2	0	0	0	0	0	0	0	0
23/3 - 20.3. K12	1	1	1	2	0	0	0	0	0	0	0	0
23/3 - 20.3. K13	1	1	1	2	0	0	0	0	0	0	0	0
23/3 - 20.3. K14	1	1	1	2	0	0	0	0	0	0	0	0
23/3 - 20.3. K15	1	1	1	2	0	0	0	0	0	0	0	0
23/3 - 20.3. K16	1	1	1	2	0	0	0	0	0	0	0	0
23/3 - 20.3. K17	1	1	1	2	0	0	0	0	0	0	0	0
23/3 - 20.3. K18	1	1	1	2	0	0	0	0	0	0	0	0
23/3 - 20.3. K19	1	1	1	2	0	0	0	0	0	0	0	0
23/3 - 20.3. K20	1	1	1	2	0	0	0	0	0	0	0	0
23/3 - 20.3. K21	1	1	1	2	0	0	0	0	0	0	0	0
23/3 - 20.3. K22	1	1	1	2	0	0	0	0	0	0	0	0
22/7 - 20.3. K1	1	1	1	2	1	1	0	1	1	0	4	1	1245
22/7 - 20.3. K2	1	1	1	2	1	1	0	1	1	0	4	1	1245
22/7 - 20.3. K3	1	1	1	2	1	1	0	1	1	0	4	1	1245
22/7 - 20.3. K4	1	1	1	2	1	1	0	1	1	0	4	1	1245
22/7 - 20.3. K5	1	1	1	2	1	1	0	1	1	0	4	1	1245
22/7 - 20.3. K6	1	1	1	2	1	1	0	1	1	0	4	1	1245
22/7 - 20.3. K7	1	1	1	2	1	0	0	0	1	0	2	0	15
22/7 - 20.3. K8	1	1	1	2	1	1	0	1	1	0	4	1	1245
22/7 - 20.3. K9	1	1	1	2	1	1	0	0	1	0	3	1	125
22/7 - 20.3. K10	1	1	1	2	0	0	0	0	0	0	0	0
22/7 - 20.3. K11	1	1	1	2	0	0	0	1	0	0	1	0	4
22/7 - 20.3. K12	1	1	1	2	0	0	0	0	0	0	0	0
22/7 - 20.3. K13	1	1	1	2	0	0	0	0	0	0	0	0
22/7 - 20.3. K14	1	1	1	2	0	0	0	0	0	0	0	0
22/7 - 20.3. K15	1	1	1	2	0	0	0	0	0	0	0	0
22/7 - 20.3. K16	1	1	1	2	0	0	0	0	0	0	0	0
22/7 - 20.3. K17	1	1	1	2	0	0	0	0	0	0	0	0
22/7 - 20.3. K18	1	1	1	2	0	0	0	0	0	0	0	0
22/7 - 20.3. K19	1	1	1	2	0	0	0	0	0	0	0	0
22/7 - 20.3. K20	1	1	1	2	0	0	0	0	0	0	0	0
22/7 - 20.3. K21	1	1	1	2	0	0	0	0	0	0	0	0
22/7 - 20.3. K22	1	1	1	2	0	0	0	0	0	0	0	0
22/2 - 20.3. K1	2	1	1	2	1	1	0	1	1	0	4	1	1245
22/2 - 20.3. K2	2	1	1	2	1	1	0	1	1	0	4	1	1245
22/2 - 20.3. K3	2	1	1	2	1	1	0	1	1	0	4	1	1245
22/2 - 20.3. K4	2	1	1	2	1	1	0	1	1	0	4	1	1245
22/2 - 20.3. K5	2	1	1	2	1	1	0	1	1	0	4	1	1245
22/2 - 20.3. K6	2	1	1	2	1	1	0	1	1	0	4	1	1245
22/2 - 20.3. K7	2	1	1	2	1	1	0	1	1	0	4	1	1245
22/2 - 20.3. K8	2	1	1	2	1	1	0	1	1	0	4	1	1245
22/2 - 20.3. K9	2	1	1	2	1	1	0	0	1	0	3	1	125
22/2 - 20.3. K10	2	1	1	2	1	1	0	0	1	0	3	1	125
22/2 - 20.3. K17	2	1	1	2	0	0	0	0	0	0	0	0
22/2 - 20.3. K18	2	1	1	2	0	0	0	0	0	0	0	0
22/2 - 20.3. K19	2	1	1	2	0	0	0	0	0	0	0	0
22/2 - 20.3. K20	2	1	1	2	0	0	0	0	0	0	0	0
22/2 - 20.3. K21	2	1	1	2	0	0	0	0	0	0	0	0
22/2 - 20.3. K22	2	1	1	2	0	0	0	0	0	0	0	0
18/1 - 31.3. K1	1	1	1	3	1	1	0	1	1	0	4	1	1245
18/1 - 31.3. K2	1	1	1	3	1	1	0	1	1	0	4	1	1245
18/1 - 31.3. K3	1	1	1	3	1	1	0	1	1	0	4	1	1245
18/1 - 31.3. K4	1	1	1	3	1	1	0	1	1	0	4	1	1245
18/1 - 31.3. K5	1	1	1	3	1	1	0	1	1	0	4	1	1245
18/1 - 31.3. K6	1	1	1	3	0	1	0	1	1	0	3	1	245
18/1 - 31.3. K7	1	1	1	3	1	1	0	1	1	0	4	1	1245
18/1 - 31.3. K8	1	1	1	3	0	1	0	0	1	0	2	0	25
18/1 - 31.3. K9	1	1	1	3	0	0	0	0	1	0	1	0	5
18/1 - 31.3. K10	1	1	1	3	0	0	0	0	1	0	1	0	5
18/1 - 31.3. K11	1	1	1	3	0	0	0	0	1	0	1	0	5
18/1 - 31.3. K12	1	1	1	3	0	0	0	0	0	0	0	0
18/1 - 31.3. K13	1	1	1	3	0	0	0	0	0	0	0	0
18/1 - 31.3. K14	1	1	1	3	0	0	0	0	0	0	0	0
18/1 - 31.3. K15	1	1	1	3	0	0	0	0	0	0	0	0
18/1 - 31.3. K16	1	1	1	3	0	0	0	0	0	0	0	0
18/1 - 31.3. K17	1	1	1	3	0	0	0	0	0	0	0	0
18/1 - 31.3. K18	1	1	1	3	0	0	0	0	0	0	0	0
18/1 - 31.3. K19	1	1	1	3	0	0	0	0	0	0	0	0
18/1 - 31.3. K20	1	1	1	3	0	0	0	0	0	0	0	0
18/1 - 31.3. K21	1	1	1	3	0	0	0	0	0	0	0	0
18/1 - 31.3. K22	1	1	1	3	0	0	0	0	0	0	0	0
18/4 - 31.3. K4	1	1	0	3
18/4 - 31.3. K5	1	1	1	3	0	1	0	0	0	0	1	0	2
18/4 - 31.3. K6	1	1	1	3	0	1	0	0	0	0	1	0	2
18/4 - 31.3. K7	1	1	1	3	0	1	0	0	0	0	1	0	2
18/4 - 31.3. K8	1	1	1	3	0	1	0	0	0	0	1	0	2
18/4 - 31.3. K9	1	1	1	3	0	1	0	0	0	0	1	0	2
18/4 - 31.3. K10	1	1	1	3	0	0	0	0	0	0	0	0
18/4 - 31.3. K11	1	1	1	3	0	0	0	0	0	0	0	0
18/4 - 31.3. K12	1	1	1	3	0	0	0	0	0	0	0	0
18/4 - 31.3. K13	1	1	1	3	0	0	0	0	0	0	0	0
18/4 - 31.3. K14	1	1	1	3	0	0	0	0	0	0	0	0
18/4 - 31.3. K15	1	1	1	3	0	0	0	0	0	0	0	0
18/4 - 31.3. K16	1	1	1	3	0	0	0	0	0	0	0	0
18/4 - 31.3. K17	1	1	1	3	0	0	0	0	0	0	0	0
18/4 - 31.3. K18	1	1	1	3	0	0	0	0	0	0	0	0
18/4 - 31.3. K19	1	1	1	3	0	0	0	0	0	0	0	0
18/4 - 31.3. K20	1	1	1	3	0	1	0	0	0	0	1	0	2
18/4 - 31.3. K21	1	1	1	3	0	0	0	0	0	0	0	0
18/4 - 31.3. K22	1	1	1	3	0	0	0	0	0	0	0	0
20/3 - 31.3. K1	2	1	1	3	1	0	0	0	1	0	2	0	15
20/3 - 31.3. K2	2	1	1	3	0	1	0	1	1	0	3	1	245
20/3 - 31.3. K3	2	1	1	3	0	1	0	1	1	0	3	1	245
20/3 - 31.3. K4	2	1	1	3	0	1	0	1	1	0	3	1	245
20/3 - 31.3. K5	2	1	1	3	0	1	0	1	1	0	3	1	245
20/3 - 31.3. K6	2	1	1	3	0	1	0	1	1	0	3	1	245
20/3 - 31.3. K7	2	1	1	3	0	1	0	1	1	0	3	1	245
20/3 - 31.3. K8	2	1	1	3	0	1	0	1	1	0	3	1	245
20/3 - 31.3. K9	2	1	1	3	0	1	0	1	1	0	3	1	245
20/3 - 31.3. K10	2	1	1	3	0	1	0	1	1	0	3	1	245
20/3 - 31.3. K11	2	1	1	3	0	0	0	0	0	0	0	0
20/3 - 31.3. K12	2	1	1	3	0	1	0	1	1	0	3	1	245
20/3 - 31.3. K14	2	1	1	3	0	0	0	0	0	0	0	0
20/3 - 31.3. K15	2	1	1	3	0	1	0	1	1	0	3	1	245
20/3 - 31.3. K16	2	1	1	3	0	0	0	0	0	0	0	0
20/3 - 31.3. K17	2	1	1	3	0	1	0	1	1	0	3	1	245
20/3 - 31.3. K18	2	1	1	3	0	0	0	0	0	0	0	0
20/3 - 31.3. K19	2	1	1	3	0	0	0	0	0	0	0	0
20/3 - 31.3. K20	2	1	1	3	0	1	0	1	1	0	3	1	245
20/3 - 31.3. K21	2	1	1	3	0	0	0	0	0	0	0	0
20/3 - 31.3. K22	2	1	1	3	0	1	0	1	1	0	3	1	245
22/5 - 31.3. K1	2	1	1	3	1	1	0	0	1	0	3	1	125
22/5 - 31.3. K2	2	1	1	3	1	1	0	0	1	0	3	1	125
22/5 - 31.3. K3	2	1	1	3	0	1	0	0	0	0	1	0	2
22/5 - 31.3. K4	2	1	1	3	0	0	0	0	0	0	0	0
22/5 - 31.3. K5	2	1	1	3	0	0	0	0	0	0	0	0
22/5 - 31.3. K6	2	1	1	3	0	1	0	0	0	0	1	0	2
22/5 - 31.3. K7	2	1	1	3	0	0	0	0	0	0	0	0
22/5 - 31.3. K8	2	1	1	3	0	1	0	0	0	0	1	0	2
22/5 - 31.3. K9	2	1	1	3	0	0	0	0	0	0	0	0
22/5 - 31.3. K10	2	1	1	3	0	1	0	0	0	0	1	0	2
22/5 - 31.3. K11	2	1	1	3	0	1	0	0	0	0	1	0	2
22/5 - 31.3. K12	2	1	1	3	0	1	0	0	0	0	1	0	2
22/5 - 31.3. K13	2	1	1	3	0	1	0	0	0	0	1	0	2
22/5 - 31.3. K14	2	1	1	3	0	0	0	0	0	0	0	0
22/5 - 31.3. K15	2	1	1	3	0	0	0	0	0	0	0	0
22/5 - 31.3. K16	2	1	1	3	0	1	0	0	0	0	1	0	2
22/5 - 31.3. K17	2	1	1	3	0	1	0	0	0	0	1	0	2
22/5 - 31.3. K18	2	1	1	3	0	0	0	0	0	0	0	0
20/1 - 31.3. K1	1	1	1	3	1	1	0	0	1	0	3	1	125
20/1 - 31.3. K3	1	1	1	3	1	1	0	0	1	0	3	1	125
20/1 - 31.3. K4	1	1	1	3	1	1	0	0	1	0	3	1	125
20/1 - 31.3. K5	1	1	1	3	1	1	0	0	1	0	3	1	125
20/1 - 31.3. K6	1	1	1	3	1	1	0	0	1	0	3	1	125
20/1 - 31.3. K7	1	1	1	3	1	1	0	0	1	0	3	1	125
20/1 - 31.3. K8	1	1	1	3	1	1	0	0	1	0	3	1	125
20/1 - 31.3. K9	1	1	1	3	1	1	0	0	1	0	3	1	125
20/1 - 31.3. K10	1	1	1	3	1	1	0	0	1	0	3	1	125
20/1 - 31.3. K11	1	1	1	3	0	0	0	0	0	0	0	0
20/1 - 31.3. K12	1	1	1	3	0	0	0	0	0	0	0	0
20/1 - 31.3. K13	1	1	1	3	0	0	0	0	0	0	0	0
20/1 - 31.3. K14	1	1	1	3	0	0	0	0	0	0	0	0
20/1 - 31.3. K15	1	1	1	3	0	0	0	0	0	0	0	0
20/1 - 31.3. K16	1	1	1	3	0	0	0	0	0	0	0	0
20/1 - 31.3. K17	1	1	1	3	0	0	0	0	0	0	0	0
20/1 - 31.3. K18	1	1	1	3	0	0	0	0	0	0	0	0
20/1 - 31.3. K19	1	1	1	3	0	0	0	0	0	0	0	0
20/1 - 31.3. K20	1	1	1	3	0	0	0	0	0	0	0	0
20/1 - 31.3. K21	1	1	1	3	0	0	0	0	0	0	0	0
20/1 - 31.3. K22	1	1	1	3	0	0	0	0	0	0	0	0
23/8 - 31.3. K1	2	1	1	3	0	0	0	0	0	0	0	0
23/8 - 31.3. K2	2	1	1	3	0	0	0	0	0	0	0	0
23/8 - 31.3. K4	2	1	1	3	0	0	0	0	0	0	0	0
23/8 - 31.3. K6	2	1	1	3	0	0	0	0	0	0	0	0
23/8 - 31.3. K7	2	1	1	3	0	0	0	0	0	0	0	0
23/8 - 31.3. K8	2	1	1	3	0	0	0	0	0	0	0	0
23/8 - 31.3. K9	2	1	1	3	0	0	0	0	0	0	0	0
23/8 - 31.3. K10	2	1	1	3	0	0	0	0	0	0	0	0
23/8 - 31.3. K11	2	1	1	3	0	0	0	0	0	0	0	0
23/8 - 31.3. K12	2	1	1	3	0	0	0	0	0	0	0	0
23/8 - 31.3. K13	2	1	1	3	0	0	0	0	0	0	0	0
23/8 - 31.3. K14	2	1	1	3	0	0	0	0	0	0	0	0
23/8 - 31.3. K15	2	1	1	3	0	0	0	0	0	0	0	0
23/8 - 31.3. K16	2	1	1	3	0	0	0	0	0	0	0	0
23/8 - 31.3. K17	2	1	1	3	0	0	0	0	0	0	0	0
23/8 - 31.3. K18	2	1	1	3	0	0	0	0	0	0	0	0
23/8 - 31.3. K19	2	1	1	3	0	0	0	0	0	0	0	0
23/8 - 31.3. K20	2	1	1	3	0	0	0	0	0	0	0	0
23/8 - 31.3. K21	2	1	1	3	0	0	0	0	0	0	0	0
23/8 - 31.3. K22	2	1	1	3	0	0	0	0	0	0	0	0
23/1 - 31.3. K2	1	1	1	3	0	0	0	0	0	0	0	0
23/1 - 31.3. K3	1	1	1	3	0	0	0	0	0	0	0	0
23/1 - 31.3. K4	1	1	1	3	0	0	0	0	0	0	0	0
23/1 - 31.3. K6	1	1	1	3	0	0	0	0	0	0	0	0
23/1 - 31.3. K7	1	1	1	3	0	0	0	0	0	0	0	0
23/1 - 31.3. K8	1	1	1	3	0	0	0	0	0	0	0	0
23/1 - 31.3. K9	1	1	1	3	0	0	0	0	0	0	0	0
23/1 - 31.3. K10	1	1	1	3	0	0	0	0	0	0	0	0
23/1 - 31.3. K11	1	1	1	3	0	0	0	0	0	0	0	0
23/1 - 31.3. K12	1	1	1	3	0	0	0	0	0	0	0	0
23/1 - 31.3. K13	1	1	1	3	0	0	0	0	0	0	0	0
23/1 - 31.3. K14	1	1	1	3	0	0	0	0	0	0	0	0
23/1 - 31.3. K15	1	1	1	3	0	0	0	0	0	0	0	0
23/1 - 31.3. K16	1	1	1	3	0	0	0	0	0	0	0	0
23/1 - 31.3. K17	1	1	1	3	0	0	0	0	0	0	0	0
23/1 - 31.3. K18	1	1	1	3	0	0	0	0	0	0	0	0
23/1 - 31.3. K19	1	1	1	3	0	0	0	0	0	0	0	0
22/6 - 31.3. K1	1	1	1	3	0	0	0	1	1	0	2	0	45
22/6 - 31.3. K3	1	1	1	3	0	0	0	0	0	0	0	0
22/6 - 31.3. K5	1	1	1	3	0	0	0	0	0	0	0	0
22/6 - 31.3. K6	1	1	1	3	0	0	0	0	0	0	0	0
22/6 - 31.3. K11	1	1	1	3	0	0	0	0	0	0	0	0
22/6 - 31.3. K14	1	1	1	3	0	0	0	0	0	0	0	0
22/6 - 31.3. K16	1	1	1	3	0	0	0	0	0	0	0	0
23/5 - 31.3. K1	2	1	1	3	1	1	0	1	1	0	4	1	1245
23/5 - 31.3. K2	2	1	1	3	1	1	0	1	1	0	4	1	1245
23/5 - 31.3. K3	2	1	1	3	1	1	0	1	1	0	4	1	1245
23/5 - 31.3. K4	2	1	1	3	1	1	0	0	1	0	3	1	125
23/5 - 31.3. K5	2	1	1	3	1	1	0	1	1	0	4	1	1245
23/5 - 31.3. K6	2	1	1	3	1	1	0	1	1	0	4	1	1245
23/5 - 31.3. K7	2	1	1	3	1	1	0	1	1	0	4	1	1245
23/5 - 31.3. K8	2	1	1	3	1	1	0	1	1	0	4	1	1245
23/5 - 31.3. K9	2	1	1	3	1	1	0	1	1	0	4	1	1245
23/5 - 31.3. K10	2	1	1	3	1	1	0	1	1	0	4	1	1245
23/5 - 31.3. K11	2	1	1	3	0	0	0	0	0	0	0	0
23/5 - 31.3. K12	2	1	1	3	1	1	0	1	1	0	4	1	1245
23/5 - 31.3. K13	2	1	1	3	1	1	0	1	1	0	4	1	1245
23/5 - 31.3. K14	2	1	1	3	1	1	0	1	1	0	4	1	1245
23/5 - 31.3. K15	2	1	1	3	0	0	0	0	0	0	0	0
23/5 - 31.3. K16	2	1	1	3	0	0	0	0	1	0	1	0	5
23/5 - 31.3. K17	2	1	1	3	0	0	0	0	0	0	0	0
23/5 - 31.3. K18	2	1	1	3	1	1	0	1	1	0	4	1	1245
23/5 - 31.3. K19	2	1	1	3	0	0	0	0	0	0	0	0
23/5 - 31.3. K20	2	1	1	3	0	0	0	0	0	0	0	0
23/5 - 31.3. K21	2	1	1	3	1	1	0	1	1	0	4	1	1245
23/5 - 31.3. K22	2	1	1	3	1	1	0	1	1	0	4	1	1245
23/9 - 31.3. K1	2	1	1	3	1	1	0	0	1	0	3	1	125
23/9 - 31.3. K2	2	1	1	3	1	1	0	1	1	0	4	1	1245
23/9 - 31.3. K3	2	1	1	3	1	1	0	0	1	0	3	1	125
23/9 - 31.3. K4	2	1	1	3	1	1	0	0	1	0	3	1	125
23/9 - 31.3. K5	2	1	1	3	1	1	0	1	1	0	4	1	1245
23/9 - 31.3. K6	2	1	1	3	1	1	0	1	1	0	4	1	1245
23/9 - 31.3. K7	2	1	1	3	1	1	0	1	1	0	4	1	1245
23/9 - 31.3. K8	2	1	1	3	1	1	0	0	1	0	3	1	125
23/9 - 31.3. K9	2	1	1	3	1	1	0	0	1	0	3	1	125
23/9 - 31.3. K10	2	1	1	3	1	1	0	0	1	0	3	1	125
23/9 - 31.3. K11	2	1	1	3	1	1	0	0	1	0	3	1	125
23/9 - 31.3. K12	2	1	1	3	1	1	0	0	1	0	3	1	125
23/9 - 31.3. K13	2	1	1	3	0	0	0	0	0	0	0	0
23/9 - 31.3. K14	2	1	1	3	0	0	0	0	0	0	0	0
23/9 - 31.3. K15	2	1	1	3	0	0	0	0	0	0	0	0
23/9 - 31.3. K16	2	1	1	3	0	0	0	0	0	0	0	0
23/9 - 31.3. K17	2	1	1	3	0	0	0	0	0	0	0	0
23/9 - 31.3. K18	2	1	1	3	0	0	0	0	0	0	0	0
23/9 - 31.3. K19	2	1	1	3	0	0	0	0	0	0	0	0
23/9 - 31.3. K20	2	1	1	3	1	1	0	0	1	0	3	1	125
23/9 - 31.3. K21	2	1	1	3	0	0	0	0	0	0	0	0
23/9 - 31.3. K22	2	1	1	3	0	0	0	0	0	0	0	0
20/12 - 31.3. K1	1	1	1	3	1	1	0	0	1	0	3	1	125
20/12 - 31.3. K2	1	1	1	3	1	1	0	0	1	0	3	1	125
20/12 - 31.3. K3	1	1	1	3	1	1	0	0	1	0	3	1	125
20/12 - 31.3. K4	1	1	1	3	1	1	0	0	1	0	3	1	125
20/12 - 31.3. K6	1	1	1	3	0	1	0	0	0	0	1	0	2
20/12 - 31.3. K7	1	1	1	3	0	0	0	0	0	0	0	0
20/12 - 31.3. K8	1	1	1	3	0	1	0	0	0	0	1	0	2
20/12 - 31.3. K9	1	1	1	3	0	0	0	0	0	0	0	0
20/12 - 31.3. K10	1	1	1	3	0	1	0	0	0	0	1	0	2
20/12 - 31.3. K11	1	1	1	3	0	1	0	0	0	0	1	0	2
20/12 - 31.3. K12	1	1	1	3	0	0	0	0	0	0	0	0
20/12 - 31.3. K13	1	1	1	3	0	1	0	0	0	0	1	0	2
20/12 - 31.3. K14	1	1	1	3	0	1	0	0	0	0	1	0	2
20/12 - 31.3. K15	1	1	1	3	0	1	0	0	0	0	1	0	2
20/12 - 31.3. K16	1	1	1	3	0	1	0	0	0	0	1	0	2
20/12 - 31.3. K17	1	1	1	3	0	1	0	0	0	0	1	0	2
20/12 - 31.3. K18	1	1	1	3	0	1	0	0	0	0	1	0	2
20/12 - 31.3. K19	1	1	1	3	0	1	0	0	0	0	1	0	2
20/12 - 31.3. K20	1	1	1	3	0	1	0	0	0	0	1	0	2
20/12 - 31.3. K21	1	1	1	3	0	1	0	0	0	0	1	0	2
20/12 - 31.3. K22	1	1	1	3	0	0	0	0	0	0	0	0
23/6 - 31.3. K4	2	1	1	3	0	0	0	0	0	0	0	0
23/6 - 31.3. K8	2	1	1	3	0	0	0	0	0	0	0	0
23/6 - 31.3. K9	2	1	1	3	0	1	0	0	0	0	1	0	2
23/6 - 31.3. K10	2	1	1	3	0	0	0	0	0	0	0	0
23/6 - 31.3. K16	2	1	1	3	0	0	0	0	0	0	0	0
23/6 - 31.3. K17	2	1	1	3	0	0	0	0	0	0	0	0
23/6 - 31.3. K18	2	1	1	3	0	1	0	0	0	0	1	0	2
23/6 - 31.3. K19	2	1	1	3	0	0	0	0	0	0	0	0
23/6 - 31.3. K21	2	1	1	3	0	1	0	0	0	0	1	0	2
23/10 - 31.3. K1	2	1	1	3	1	0	0	0	0	0	1	0	1
23/10 - 31.3. K2	2	1	1	3	1	0	0	0	0	0	1	0	1
23/10 - 31.3. K3	2	1	1	3	1	0	0	0	0	0	1	0	1
23/10 - 31.3. K4	2	1	1	3	1	0	0	0	0	0	1	0	1
23/10 - 31.3. K5	2	1	1	3	1	0	0	0	0	0	1	0	1
23/10 - 31.3. K6	2	1	1	3	1	0	0	0	0	0	1	0	1
23/10 - 31.3. K7	2	1	1	3	1	0	0	0	0	0	1	0	1
23/10 - 31.3. K8	2	1	1	3	1	0	0	0	0	0	1	0	1
23/10 - 31.3. K9	2	1	1	3	1	0	0	0	0	0	1	0	1
23/10 - 31.3. K10	2	1	0	3
23/10 - 31.3. K11	2	1	1	3	0	0	0	0	0	0	0	0
23/10 - 31.3. K12	2	1	1	3	0	0	0	0	0	0	0	0
23/10 - 31.3. K13	2	1	1	3	0	0	0	0	0	0	0	0
23/10 - 31.3. K14	2	1	1	3	0	0	0	0	0	0	0	0
23/10 - 31.3. K15	2	1	1	3	0	0	0	0	0	0	0	0
23/10 - 31.3. K16	2	1	1	3	0	0	0	0	0	0	0	0
23/10 - 31.3. K17	2	1	1	3	0	0	0	0	0	0	0	0
23/10 - 31.3. K18	2	1	1	3	0	0	0	0	0	0	0	0
23/10 - 31.3. K19	2	1	1	3	0	0	0	0	0	0	0	0
23/10 - 31.3. K20	2	1	1	3	0	0	0	0	0	0	0	0
23/10 - 31.3. K21	2	1	1	3	0	0	0	0	0	0	0	0
23/10 - 31.3. K22	2	1	1	3	0	0	0	0	0	0	0	0
23/3 - 31.1. K1	1	1	1	3	1	0	0	0	1	0	2	0	15
23/3 - 31.1. K2	1	1	1	3	1	0	0	0	1	0	2	0	15
23/3 - 31.1. K3	1	1	1	3	1	0	0	0	1	0	2	0	15
23/3 - 31.1. K4	1	1	1	3	1	0	0	0	1	0	2	0	15
23/3 - 31.1. K5	1	1	1	3	1	0	0	0	1	0	2	0	15
23/3 - 31.1. K6	1	1	1	3	1	0	0	0	1	0	2	0	15
23/3 - 31.1. K7	1	1	1	3	1	0	0	0	1	0	2	0	15
23/3 - 31.1. K8	1	1	1	3	1	0	0	0	1	0	2	0	15
23/3 - 31.1. K9	1	1	1	3	1	0	0	0	1	0	2	0	15
23/3 - 31.1. K10	1	1	1	3	1	0	0	0	1	0	2	0	15
23/3 - 31.1. K11	1	1	1	3	0	0	0	0	0	0	0	0
23/3 - 31.1. K12	1	1	1	3	1	0	0	0	1	0	2	0	15
23/3 - 31.1. K13	1	1	1	3	1	0	0	0	1	0	2	0	15
23/3 - 31.1. K14	1	1	1	3	0	0	0	0	0	0	0	0
23/3 - 31.1. K15	1	1	1	3	1	0	0	0	1	0	2	0	15
23/3 - 31.1. K16	1	1	1	3	1	0	0	0	1	0	2	0	15
23/3 - 31.1. K17	1	1	1	3	0	0	0	0	0	0	0	0
23/3 - 31.1. K18	1	1	1	3	0	0	0	0	0	0	0	0
23/3 - 31.1. K19	1	1	1	3	0	0	0	0	0	0	0	0
23/3 - 31.1. K20	1	1	1	3	1	0	0	0	1	0	2	0	15
23/3 - 31.1. K21	1	1	1	3	1	0	0	0	1	0	2	0	15
23/3 - 31.1. K22	1	1	1	3	0	0	0	0	0	0	0	0
22/7 - 31.3. K1	1	1	1	3	1	0	0	0	1	0	2	0	15
22/7 - 31.3. K2	1	1	1	3	1	1	0	0	1	0	3	1	125
22/7 - 31.3. K3	1	1	1	3	0	0	0	0	1	0	1	0	5
22/7 - 31.3. K4	1	1	1	3	0	0	0	0	1	0	1	0	5
22/7 - 31.3. K5	1	1	1	3	0	0	0	0	1	0	1	0	5
22/7 - 31.3. K6	1	1	1	3	0	0	0	0	1	0	1	0	5
22/7 - 31.3. K7	1	1	1	3	0	0	0	0	1	0	1	0	5
22/7 - 31.3. K8	1	1	1	3	0	0	0	0	1	0	1	0	5
22/7 - 31.3. K9	1	1	1	3	0	0	0	0	0	0	0	0
22/7 - 31.3. K10	1	1	1	3	0	0	0	0	0	0	0	0
22/7 - 31.3. K11	1	1	1	3	0	0	0	0	0	0	0	0
22/7 - 31.3. K12	1	1	1	3	0	0	0	0	0	0	0	0
22/7 - 31.3. K13	1	1	1	3	0	0	0	0	0	0	0	0
22/7 - 31.3. K14	1	1	1	3	0	0	0	0	0	0	0	0
22/7 - 31.3. K15	1	1	1	3	0	0	0	0	0	0	0	0
22/7 - 31.3. K16	1	1	1	3	0	0	0	0	0	0	0	0
22/7 - 31.3. K17	1	1	1	3	0	0	0	0	0	0	0	0
22/7 - 31.3. K18	1	1	1	3	0	0	0	0	0	0	0	0
22/7 - 31.3. K19	1	1	1	3	0	0	0	0	0	0	0	0
22/7 - 31.3. K20	1	1	1	3	0	0	0	0	0	0	0	0
22/7 - 31.3. K21	1	1	1	3	0	0	0	0	0	0	0	0
22/7 - 31.3. K22	1	1	1	3	0	0	0	0	0	0	0	0
22/2 - 31.3. K1	2	1	1	3	0	0	0	0	0	0	0	0
22/2 - 31.3. K2	2	1	1	3	0	0	0	0	0	0	0	0
22/2 - 31.3. K3	2	1	1	3	0	0	0	0	0	0	0	0
22/2 - 31.3. K4	2	1	1	3	0	0	0	0	0	0	0	0
22/2 - 31.3. K5	2	1	1	3	0	0	0	0	0	0	0	0
22/2 - 31.3. K6	2	1	1	3	0	0	0	0	0	0	0	0
22/2 - 31.3. K7	2	1	1	3	0	0	0	0	0	0	0	0
22/2 - 31.3. K8	2	1	1	3	0	0	0	0	0	0	0	0
22/2 - 31.3. K9	2	1	1	3	0	0	0	0	0	0	0	0
22/2 - 31.3. K10	2	1	1	3	0	0	0	0	0	0	0	0
22/2 - 31.3. K11	2	1	1	3	0	0	0	0	0	0	0	0
22/2 - 31.3. K12	2	1	1	3	0	0	0	0	0	0	0	0
22/2 - 31.3. K13	2	1	1	3	0	0	0	0	0	0	0	0
22/2 - 31.3. K14	2	1	1	3	0	0	0	0	0	0	0	0
22/2 - 31.3. K15	2	1	1	3	0	0	0	0	0	0	0	0
22/2 - 31.3. K16	2	1	1	3	0	0	0	0	0	0	0	0
22/2 - 31.3. K17	2	1	1	3	0	0	0	0	0	0	0	0
22/2 - 31.3. K18	2	1	1	3	0	0	0	0	0	0	0	0
22/2 - 31.3. K19	2	1	1	3	0	0	0	0	0	0	0	0
22/2 - 31.3. K20	2	1	1	3	0	0	0	0	0	0	0	0
22/2 - 31.3. K21	2	1	1	3	0	0	0	0	0	0	0	0
22/2 - 31.3. K22	2	1	1	3	0	0	0	0	0	0	0	0
23/4 - 18.3. D1	1	2	1	2	1	1	0	1	1	0	4	1	1245
23/4 - 18.3. D2	1	2	1	2	1	0	0	0	0	0	1	0	1
23/4 - 18.3. D3	1	2	1	2	1	1	0	1	1	0	4	1	1245
23/4 - 18.3. D4	1	2	1	2	1	1	0	1	1	0	4	1	1245
23/4 - 18.3. D5	1	2	1	2	1	0	0	0	0	0	1	0	1
23/4 - 18.3. D6	1	2	1	2	1	0	0	0	0	0	1	0	1
23/4 - 18.3. D7	1	2	1	2	1	1	0	1	1	0	4	1	1245
23/4 - 18.3. D8	1	2	1	2	1	1	0	1	1	0	4	1	1245
23/4 - 18.3. D9	1	2	1	2	1	1	0	1	1	0	4	1	1245
23/4 - 18.3. D10	1	2	1	2	1	1	0	1	1	0	4	1	1245
23/4 - 18.3. D11	1	2	1	2	0	0	0	0	0	0	0	0
23/4 - 18.3. D12	1	2	1	2	0	0	0	0	0	0	0	0
23/4 - 18.3. D13	1	2	1	2	1	1	0	1	1	0	4	1	1245
23/4 - 18.3. D14	1	2	1	2	0	0	0	0	0	0	0	0
23/4 - 18.3. D15	1	2	1	2	0	0	0	0	0	0	0	0
23/4 - 18.3. D16	1	2	1	2	0	0	0	0	0	0	0	0
23/4 - 18.3. D17	1	2	1	2	0	0	0	0	0	0	0	0
23/4 - 18.3. D18	1	2	1	2	0	0	0	0	0	0	0	0
23/4 - 18.3. D19	1	2	1	2	0	0	0	0	0	0	0	0
23/4 - 18.3. D20	1	2	1	2	0	0	0	0	0	0	0	0
23/4 - 18.3. D21	1	2	1	2	0	0	0	0	0	0	0	0
23/4 - 18.3. D22	1	2	1	2	0	0	0	0	0	0	0	0
22/8 - 18.3. D1	1	2	1	2	1	1	0	0	1	0	3	1	125
22/8 - 18.3. D2	1	2	1	2	1	1	0	0	1	0	3	1	125
22/8 - 18.3. D3	1	2	1	2	1	1	0	0	1	0	3	1	125
22/8 - 18.3. D4	1	2	1	2	1	1	0	0	1	0	3	1	125
22/8 - 18.3. D5	1	2	1	2	1	1	0	0	1	0	3	1	125
22/8 - 18.3. D6	1	2	1	2	1	1	0	0	1	0	3	1	125
22/8 - 18.3. D7	1	2	1	2	1	1	0	0	1	0	3	1	125
22/8 - 18.3. D8	1	2	1	2	1	1	0	0	1	0	3	1	125
22/8 - 18.3. D9	1	2	1	2	1	1	0	0	1	0	3	1	125
22/8 - 18.3. D10	1	2	1	2	1	1	0	0	1	0	3	1	125
22/8 - 18.3. D11	1	2	1	2	0	0	0	0	0	0	0	0
22/8 - 18.3. D12	1	2	1	2	0	0	0	0	0	0	0	0
22/8 - 18.3. D14	1	2	1	2	1	1	0	0	1	0	3	1	125
22/8 - 18.3. D15	1	2	1	2	1	0	0	0	0	0	1	0	1
22/8 - 18.3. D16	1	2	1	2	0	0	0	0	0	0	0	0
22/8 - 18.3. D17	1	2	1	2	1	1	0	0	1	0	3	1	125
22/8 - 18.3. D18	1	2	1	2	0	0	0	0	0	0	0	0
22/8 - 18.3. D19	1	2	1	2	1	1	0	0	1	0	3	1	125
22/8 - 18.3. D20	1	2	1	2	0	0	0	0	0	0	0	0
22/8 - 18.3. D21	1	2	1	2	1	1	0	0	1	0	3	1	125
22/8 - 18.3. D22	1	2	1	2	1	1	0	0	1	0	3	1	125
24/3 - 18.3. D1	2	2	1	2	1	0	0	0	0	0	1	0	1
24/3 - 18.3. D2	2	2	1	2	1	0	0	0	0	0	1	0	1
24/3 - 18.3. D4	2	2	1	2	0	1	0	1	0	0	2	0	24
24/3 - 18.3. D5	2	2	1	2	0	1	0	1	0	0	2	0	24
24/3 - 18.3. D6	2	2	1	2	1	1	0	1	1	0	4	1	1245
24/3 - 18.3. D7	2	2	1	2	0	0	0	0	0	1	1	0	6
24/3 - 18.3. D8	2	2	1	2	0	0	0	0	0	1	1	0	6
24/3 - 18.3. D9	2	2	1	2	0	0	0	0	0	1	1	0	6
24/3 - 18.3. D10	2	2	1	2	0	0	0	0	0	1	1	0	6
24/3 - 18.3. D13	2	2	1	2	0	0	0	0	0	0	0	0
24/3 - 18.3. D16	2	2	1	2	0	0	0	0	0	0	0	0
24/3 - 18.3. D18	2	2	1	2	0	1	0	0	0	0	1	0	2
24/3 - 18.3. D19	2	2	1	2	0	1	0	0	0	0	1	0	2
24/3 - 18.3. D20	2	2	1	2	0	0	0	0	0	0	0	0
24/3 - 18.3. D22	2	2	1	2	1	0	0	0	0	0	1	0	1
23/12 - 18.3. D1	2	2	1	2	1	0	0	0	0	0	1	0	1
23/12 - 18.3. D2	2	2	1	2	1	0	0	0	0	0	1	0	1
23/12 - 18.3. D3	2	2	1	2	1	0	0	0	0	0	1	0	1
23/12 - 18.3. D4	2	2	1	2	1	0	0	0	0	0	1	0	1
23/12 - 18.3. D6	2	2	1	2	1	0	0	0	0	0	1	0	1
23/12 - 18.3. D8	2	2	1	2	1	0	0	0	0	0	1	0	1
23/12 - 18.3. D10	2	2	1	2	1	0	0	0	0	0	1	0	1
23/12 - 18.3. D13	2	2	1	2	1	0	1	0	0	0	2	0	13
23/12 - 18.3. D14	2	2	1	2	1	0	0	0	0	0	1	0	1
23/12 - 18.3. D15	2	2	1	2	1	0	0	0	0	0	1	0	1
23/12 - 18.3. D16	2	2	1	2	0	0	0	0	0	0	0	0
23/12 - 18.3. D17	2	2	1	2	0	0	0	0	0	0	0	0
23/12 - 18.3. D18	2	2	1	2	0	0	0	0	0	0	0	0
23/12 - 18.3. D19	2	2	1	2	1	0	0	0	0	0	1	0	1
23/12 - 18.3. D20	2	2	1	2	1	0	0	0	0	0	1	0	1
23/12 - 18.3. D21	2	2	1	2	0	0	0	0	0	0	0	0
27/3 - 18.3. D2	1	2	1	2	1	1	0	0	1	0	3	1	125
27/3 - 18.3. D3	1	2	1	2	1	0	0	0	0	0	1	0	1
27/3 - 18.3. D4	1	2	1	2	1	1	0	0	1	0	3	1	125
27/3 - 18.3. D5	1	2	1	2	1	1	0	0	1	0	3	1	125
27/3 - 18.3. D6	1	2	1	2	1	1	0	0	1	0	3	1	125
27/3 - 18.3. D7	1	2	1	2	1	1	0	0	1	0	3	1	125
27/3 - 18.3. D8	1	2	1	2	1	1	0	0	1	0	3	1	125
27/3 - 18.3. D11	1	2	1	2	0	0	0	0	0	0	0	0
27/3 - 18.3. D15	1	2	1	2	0	0	0	0	0	0	0	0
27/3 - 18.3. D16	1	2	1	2	0	0	0	0	0	0	0	0
27/3 - 18.3. D17	1	2	1	2	0	0	0	0	0	0	0	0
27/3 - 18.3. D18	1	2	1	2	0	0	0	0	0	0	0	0
27/3 - 18.3. D19	1	2	1	2	0	0	0	0	0	0	0	0
27/3 - 18.3. D20	1	2	1	2	0	0	0	0	0	0	0	0
27/3 - 18.3. D21	1	2	1	2	0	0	0	0	0	0	0	0
27/3 - 18.3. D22	1	2	1	2	0	0	0	0	0	0	0	0
23/7 - 18.3. D1	1	2	1	2	1	1	0	0	1	0	3	1	125
23/7 - 18.3. D2	1	2	1	2	1	1	0	0	1	0	3	1	125
23/7 - 18.3. D3	1	2	1	2	1	1	0	0	1	0	3	1	125
23/7 - 18.3. D4	1	2	1	2	1	1	0	0	1	0	3	1	125
23/7 - 18.3. D5	1	2	1	2	1	1	0	0	1	0	3	1	125
23/7 - 18.3. D6	1	2	1	2	0	1	0	1	0	0	2	0	24
23/7 - 18.3. D7	1	2	1	2	0	1	0	1	0	0	2	0	24
23/7 - 18.3. D8	1	2	1	2	1	1	0	0	1	0	3	1	125
23/7 - 18.3. D9	1	2	1	2	1	1	0	0	1	0	3	1	125
23/7 - 18.3. D11	1	2	1	2	1	1	0	0	1	0	3	1	125
23/7 - 18.3. D14	1	2	1	2	1	1	0	0	1	0	3	1	125
23/7 - 18.3. D16	1	2	1	2	1	1	0	0	1	0	3	1	125
23/7 - 18.3. D17	1	2	1	2	1	1	0	0	1	0	3	1	125
23/7 - 18.3. D18	1	2	1	2	1	1	0	0	1	0	3	1	125
23/7 - 18.3. D19	1	2	1	2	1	1	0	0	1	0	3	1	125
23/7 - 18.3. D20	1	2	1	2	1	1	0	0	1	0	3	1	125
23/7 - 18.3. D21	1	2	1	2	1	1	0	0	1	0	3	1	125
23/7 - 18.3. D22	1	2	1	2	1	1	0	0	1	0	3	1	125
24/6 - 18.3. D1	2	2	1	2	1	1	0	0	1	0	3	1	125
24/6 - 18.3. D2	2	2	1	2	1	1	0	0	1	0	3	1	125
24/6 - 18.3. D3	2	2	1	2	1	1	0	1	1	0	4	1	1245
24/6 - 18.3. D4	2	2	1	2	1	1	0	1	1	0	4	1	1245
24/6 - 18.3. D5	2	2	1	2	0	0	0	0	0	1	1	0	6
24/6 - 18.3. D6	2	2	1	2	0	0	0	0	0	1	1	0	6
24/6 - 18.3. D7	2	2	1	2	0	1	0	1	0	0	2	0	24
24/6 - 18.3. D8	2	2	1	2	1	1	0	1	1	0	4	1	1245
24/6 - 18.3. D9	2	2	1	2	1	1	0	0	1	0	3	1	125
24/6 - 18.3. D10	2	2	1	2	1	1	0	0	1	0	3	1	125
24/6 - 18.3. D11	2	2	1	2	0	0	0	0	0	1	1	0	6
24/6 - 18.3. D12	2	2	1	2	0	0	0	0	0	1	1	0	6
24/6 - 18.3. D15	2	2	1	2	0	0	0	0	0	0	0	0
24/6 - 18.3. D18	2	2	1	2	1	0	0	0	0	0	1	0	1
24/6 - 18.3. D19	2	2	1	2	0	0	0	0	0	0	0	0
24/6 - 18.3. D20	2	2	1	2	0	0	0	0	0	0	0	0
24/6 - 18.3. D21	2	2	1	2	1	1	0	0	1	0	3	1	125
24/6 - 18.3. D22	2	2	1	2	0	0	0	0	0	0	0	0
24/11 - 18.3. D1	2	2	1	2	1	1	0	0	1	0	3	1	125
24/11 - 18.3. D2	2	2	1	2	1	1	0	1	1	0	4	1	1245
24/11 - 18.3. D3	2	2	1	2	1	1	0	1	1	0	4	1	1245
24/11 - 18.3. D4	2	2	1	2	1	1	0	1	1	0	4	1	1245
24/11 - 18.3. D5	2	2	1	2	0	0	0	0	0	1	1	0	6
24/11 - 18.3. D6	2	2	1	2	0	0	0	0	0	1	1	0	6
24/11 - 18.3. D7	2	2	1	2	0	1	0	1	0	0	2	0	24
24/11 - 18.3. D8	2	2	1	2	1	1	0	1	1	0	4	1	1245
24/11 - 18.3. D9	2	2	1	2	1	1	0	0	1	0	3	1	125
24/11 - 18.3. D10	2	2	1	2	1	1	0	0	1	0	3	1	125
24/11 - 18.3. D11	2	2	1	2	0	0	0	0	0	1	1	0	6
24/11 - 18.3. D12	2	2	1	2	0	0	0	0	0	1	1	0	6
24/11 - 18.3. D14	2	2	1	2	0	1	0	1	0	0	2	0	24
24/11 - 18.3. D16	2	2	1	2	0	0	0	0	0	0	0	0
24/11 - 18.3. D17	2	2	1	2	0	1	0	1	0	0	2	0	24
24/11 - 18.3. D18	2	2	1	2	0	0	0	0	0	0	0	0
24/11 - 18.3. D19	2	2	1	2	0	0	0	0	1	0	1	0	5
24/11 - 18.3. D20	2	2	1	2	0	0	0	0	0	0	0	0
24/11 - 18.3. D21	2	2	1	2	0	0	0	0	0	0	0	0
24/11 - 18.3. D22	2	2	1	2	0	0	0	0	0	0	0	0
24/4 - 19.3. D2	2	2	1	2	1	0	0	0	0	0	1	0	1
24/4 - 19.3. D3	2	2	1	2	1	1	0	1	1	0	4	1	1245
24/4 - 19.3. D4	2	2	1	2	1	1	0	1	1	0	4	1	1245
24/4 - 19.3. D5	2	2	1	2	0	0	0	0	0	1	1	0	6
24/4 - 19.3. D6	2	2	1	2	0	0	0	0	0	1	1	0	6
24/4 - 19.3. D7	2	2	1	2	1	1	0	1	1	0	4	1	1245
24/4 - 19.3. D8	2	2	1	2	0	1	0	1	0	0	2	0	24
24/4 - 19.3. D9	2	2	1	2	1	1	0	0	1	0	3	1	125
24/4 - 19.3. D10	2	2	1	2	1	1	0	0	1	0	3	1	125
24/4 - 19.3. D11	2	2	1	2	0	0	0	0	0	1	1	0	6
24/4 - 19.3. D12	2	2	1	2	0	0	0	0	0	1	1	0	6
24/4 - 19.3. D17	2	2	1	2	0	1	0	1	0	0	2	0	24
24/4 - 19.3. D18	2	2	1	2	0	1	0	1	0	0	2	0	24
24/4 - 19.3. D19	2	2	1	2	0	1	0	1	0	0	2	0	24
24/4 - 19.3. D20	2	2	1	2	0	0	0	0	0	0	0	0
24/4 - 19.3. D21	2	2	1	2	0	1	0	1	0	0	2	0	24
24/4 - 19.3. D22	2	2	1	2	0	1	0	1	0	0	2	0	24
24/10 - 19.3. D2	2	2	1	2	1	1	0	1	1	0	4	1	1245
24/10 - 19.3. D3	2	2	1	2	1	1	0	1	1	0	4	1	1245
24/10 - 19.3. D4	2	2	1	2	1	1	0	1	1	0	4	1	1245
24/10 - 19.3. D5	2	2	1	2	1	0	0	0	0	0	1	0	1
24/10 - 19.3. D6	2	2	1	2	1	0	0	0	0	0	1	0	1
24/10 - 19.3. D7	2	2	1	2	1	1	0	1	1	0	4	1	1245
24/10 - 19.3. D8	2	2	1	2	0	1	0	1	0	0	2	0	24
24/10 - 19.3. D9	2	2	1	2	1	1	0	0	1	0	3	1	125
24/10 - 19.3. D10	2	2	1	2	1	1	0	0	1	0	3	1	125
24/10 - 19.3. D11	2	2	1	2	0	0	0	0	0	1	1	0	6
24/10 - 19.3. D12	2	2	1	2	0	0	0	0	0	1	1	0	6
24/10 - 19.3. D13	2	2	1	2	0	1	0	1	0	0	2	0	24
24/10 - 19.3. D15	2	2	1	2	0	1	0	1	0	0	2	0	24
24/10 - 19.3. D18	2	2	1	2	1	1	0	0	1	0	3	1	125
24/10 - 19.3. D19	2	2	1	2	0	1	0	1	0	0	2	0	24
24/10 - 19.3. D20	2	2	1	2	0	1	0	1	0	0	2	0	24
24/10 - 19.3. D21	2	2	1	2	0	1	0	0	0	0	1	0	2
24/10 - 19.3. D22	2	2	1	2	0	1	0	0	0	0	1	0	2
24/5 - 19.3. D4	1	2	1	2	1	1	0	1	1	0	4	1	1245
24/5 - 19.3. D5	1	2	1	2	1	1	0	1	1	0	4	1	1245
24/5 - 19.3. D6	1	2	1	2	1	1	0	1	1	0	4	1	1245
24/5 - 19.3. D7	1	2	1	2	1	1	0	1	1	0	4	1	1245
24/5 - 19.3. D8	1	2	1	2	1	1	0	0	1	0	3	1	125
24/5 - 19.3. D9	1	2	1	2	1	1	0	0	1	0	3	1	125
24/5 - 19.3. D10	1	2	1	2	1	1	0	1	1	0	4	1	1245
24/5 - 19.3. D12	1	2	1	2	0	0	0	0	0	0	0	0
24/5 - 19.3. D13	1	2	1	2	0	0	0	0	0	0	0	0
24/5 - 19.3. D15	1	2	1	2	0	0	0	0	0	0	0	0
24/5 - 19.3. D16	1	2	1	2	0	0	0	0	0	0	0	0
24/5 - 19.3. D17	1	2	1	2	0	0	0	0	0	0	0	0
24/5 - 19.3. D18	1	2	1	2	0	0	0	0	0	0	0	0
24/5 - 19.3. D19	1	2	1	2	0	0	0	0	0	0	0	0
24/5 - 19.3. D20	1	2	1	2	1	1	0	0	1	0	3	1	125
24/5 - 19.3. D21	1	2	1	2	0	0	0	0	0	0	0	0
24/5 - 19.3. D22	1	2	1	2	0	0	0	0	0	0	0	0
22/9 - 19.3. D4	1	2	1	2	1	1	0	1	1	0	4	1	1245
22/9 - 19.3. D5	1	2	1	2	1	1	0	1	1	0	4	1	1245
22/9 - 19.3. D6	1	2	1	2	1	1	0	1	1	0	4	1	1245
22/9 - 19.3. D7	1	2	1	2	1	1	0	1	1	0	4	1	1245
22/9 - 19.3. D8	1	2	1	2	1	1	0	1	1	0	4	1	1245
22/9 - 19.3. D9	1	2	1	2	1	1	0	0	1	0	3	1	125
22/9 - 19.3. D11	1	2	1	2	0	0	0	0	0	0	0	0
22/9 - 19.3. D14	1	2	1	2	0	0	0	0	0	0	0	0
22/9 - 19.3. D17	1	2	1	2	0	0	0	0	0	0	0	0
22/9 - 19.3. D18	1	2	1	2	0	0	0	0	0	0	0	0
22/9 - 19.3. D19	1	2	1	2	0	0	0	0	0	0	0	0
22/9 - 19.3. D20	1	2	1	2	0	0	0	0	0	0	0	0
22/9 - 19.3. D21	1	2	1	2	0	0	0	0	0	0	0	0
22/9 - 19.3. D22	1	2	1	2	0	0	0	0	0	0	0	0
22/9 - 19.3. D23	1	2	1	2	0	0	0	0	0	0	0	0
27/1 - 19.3. D1	2	2	1	2	1	1	0	0	1	0	3	1	125
27/1 - 19.3. D2	2	2	1	2	1	1	0	0	1	0	3	1	125
27/1 - 19.3. D3	2	2	1	2	1	1	0	0	1	0	3	1	125
27/1 - 19.3. D4	2	2	1	2	1	1	0	0	1	0	3	1	125
27/1 - 19.3. D5	2	2	1	2	1	1	0	0	1	0	3	1	125
27/1 - 19.3. D6	2	2	1	2	1	1	0	0	1	0	3	1	125
27/1 - 19.3. D8	2	2	1	2	1	1	0	0	1	0	3	1	125
27/1 - 19.3. D9	2	2	1	2	1	1	0	0	1	0	3	1	125
27/1 - 19.3. D13	2	2	1	2	1	1	0	0	1	0	3	1	125
27/1 - 19.3. D15	2	2	1	2	0	0	0	0	0	0	0	0
27/1 - 19.3. D16	2	2	1	2	0	0	0	0	0	0	0	0
27/1 - 19.3. D17	2	2	1	2	0	0	0	0	0	0	0	0
27/1 - 19.3. D18	2	2	1	2	1	1	0	0	1	0	3	1	125
27/1 - 19.3. D19	2	2	1	2	1	1	0	0	1	0	3	1	125
27/1 - 19.3. D20	2	2	1	2	1	1	0	0	1	0	3	1	125
27/1 - 19.3. D21	2	2	1	2	1	1	0	0	1	0	3	1	125
27/1 - 19.3. D22	2	2	1	2	0	0	0	0	0	0	0	0
27/9 - 19.3. D1	2	2	1	2	1	1	0	0	1	0	3	1	125
27/9 - 19.3. D2	2	2	1	2	1	1	0	0	1	0	3	1	125
27/9 - 19.3. D3	2	2	1	2	1	1	0	0	1	0	3	1	125
27/9 - 19.3. D5	2	2	1	2	1	1	0	1	1	0	4	1	1245
27/9 - 19.3. D6	2	2	1	2	1	1	0	1	1	0	4	1	1245
27/9 - 19.3. D7	2	2	1	2	1	1	0	1	1	0	4	1	1245
27/9 - 19.3. D8	2	2	1	2	1	1	0	0	1	0	3	1	125
27/9 - 19.3. D9	2	2	1	2	1	1	0	0	1	0	3	1	125
27/9 - 19.3. D10	2	2	1	2	1	1	0	0	1	0	3	1	125
27/9 - 19.3. D11	2	2	1	2	0	0	0	0	0	0	0	0
27/9 - 19.3. D12	2	2	1	2	0	0	0	0	0	0	0	0
27/9 - 19.3. D13	2	2	1	2	0	0	0	0	0	0	0	0
27/9 - 19.3. D14	2	2	1	2	0	0	0	0	0	0	0	0
27/9 - 19.3. D16	2	2	1	2	0	0	0	0	0	0	0	0
27/9 - 19.3. D17	2	2	1	2	0	0	0	0	0	0	0	0
27/9 - 19.3. D18	2	2	1	2	0	0	0	0	0	0	0	0
27/9 - 19.3. D19	2	2	1	2	0	0	0	0	0	0	0	0
27/9 - 19.3. D20	2	2	1	2	0	0	0	0	0	0	0	0
27/9 - 19.3. D21	2	2	1	2	1	1	0	0	1	0	3	1	125
27/9 - 19.3. D22	2	2	1	2	0	0	0	0	0	0	0	0
27/4 - 19.3. D2	1	2	1	2	1	1	0	1	0	0	3	1	124
27/4 - 19.3. D3	1	2	1	2	0	0	0	0	0	1	1	0	6
27/4 - 19.3. D4	1	2	1	2	1	1	0	1	1	0	4	1	1245
27/4 - 19.3. D5	1	2	1	2	0	0	0	0	0	1	1	0	6
27/4 - 19.3. D6	1	2	1	2	0	0	0	0	0	1	1	0	6
27/4 - 19.3. D7	1	2	1	2	1	1	0	1	1	0	4	1	1245
27/4 - 19.3. D8	1	2	1	2	0	1	0	1	0	0	2	0	24
27/4 - 19.3. D9	1	2	1	2	1	1	0	0	1	0	3	1	125
27/4 - 19.3. D10	1	2	1	2	1	1	0	1	1	0	4	1	1245
27/4 - 19.3. D11	1	2	1	2	0	0	0	0	0	1	1	0	6
27/4 - 19.3. D12	1	2	1	2	0	0	0	0	0	1	1	0	6
27/4 - 19.3. D15	1	2	1	2	0	0	0	0	0	0	0	0
27/4 - 19.3. D16	1	2	1	2	0	0	0	0	0	0	0	0
27/4 - 19.3. D17	1	2	1	2	0	0	0	0	0	0	0	0
27/4 - 19.3. D18	1	2	1	2	0	0	0	0	0	0	0	0
27/4 - 19.3. D19	1	2	1	2	0	0	0	0	0	0	0	0
27/4 - 19.3. D20	1	2	1	2	0	0	0	0	0	0	0	0
27/4 - 19.3. D21	1	2	1	2	0	0	0	0	0	0	0	0
27/4 - 19.3. D22	1	2	1	2	0	0	0	0	0	0	0	0
24/12 - 19.3. D1	1	2	1	2	1	1	0	1	1	0	4	1	1245
24/12 - 19.3. D2	1	2	1	2	1	0	0	0	0	0	1	0	1
24/12 - 19.3. D3	1	2	1	2	1	1	0	1	1	0	4	1	1245
24/12 - 19.3. D4	1	2	1	2	1	1	0	1	1	0	4	1	1245
24/12 - 19.3. D5	1	2	1	2	0	0	0	0	0	1	1	0	6
24/12 - 19.3. D6	1	2	1	2	1	1	0	1	1	0	4	1	1245
24/12 - 19.3. D7	1	2	1	2	1	1	0	0	1	0	3	1	125
24/12 - 19.3. D8	1	2	1	2	1	1	0	0	1	0	3	1	125
24/12 - 19.3. D9	1	2	1	2	0	0	0	0	0	1	1	0	6
24/12 - 19.3. D10	1	2	1	2	0	1	0	1	0	0	2	0	24
24/12 - 19.3. D11	1	2	1	2	0	0	0	0	0	1	1	0	6
24/12 - 19.3. D17	1	2	1	2	0	1	0	0	0	0	1	0	2
24/12 - 19.3. D18	1	2	1	2	1	1	0	1	1	0	4	1	1245
24/12 - 19.3. D19	1	2	1	2	0	1	0	0	0	0	1	0	2
24/12 - 19.3. D20	1	2	1	2	0	0	0	0	0	0	0	0
24/12 - 19.3. D21	1	2	1	2	1	1	0	0	1	0	3	1	125
24/12 - 19.3. D22	1	2	1	2	0	0	0	0	0	0	0	0
18/1 - 1.4. D3	1	2	1	3	0	1	0	1	0	0	2	0	24
18/1 - 1.4. D4	1	2	1	3	0	1	0	1	0	0	2	0	24
18/1 - 1.4. D5	1	2	1	3	1	1	0	1	1	0	4	1	1245
18/1 - 1.4. D7	1	2	1	3	0	0	0	0	1	0	1	0	5
18/1 - 1.4. D8	1	2	1	3	1	1	0	1	1	0	4	1	1245
18/1 - 1.4. D9	1	2	1	3	1	1	0	1	1	0	4	1	1245
18/1 - 1.4. D10	1	2	1	3	0	0	0	0	0	0	0	0
18/1 - 1.4. D11	1	2	1	3	0	0	0	0	0	0	0	0
18/1 - 1.4. D12	1	2	1	3	0	0	0	0	0	0	0	0
18/1 - 1.4. D13	1	2	1	3	0	0	0	0	0	0	0	0
18/1 - 1.4. D14	1	2	1	3	0	0	0	0	0	0	0	0
18/1 - 1.4. D16	1	2	1	3	0	0	0	0	0	0	0	0
18/1 - 1.4. D17	1	2	1	3	0	0	0	0	0	0	0	0
18/1 - 1.4. D18	1	2	1	3	0	0	0	0	0	0	0	0
18/1 - 1.4. D19	1	2	1	3	0	0	0	0	0	0	0	0
18/1 - 1.4. D20	1	2	1	3	0	0	0	0	0	0	0	0
18/1 - 1.4. D21	1	2	1	3	0	0	0	0	0	0	0	0
18/1 - 1.4. D22	1	2	1	3	0	0	0	0	0	0	0	0
18/1 - 1.4. D26	1	2	1	3	0	1	0	1	0	0	2	0	24
18/4 - 1.4. D9	1	2	1	3	0	0	0	0	0	0	0	0
18/4 - 1.4. D12	1	2	1	3	0	0	0	0	0	0	0	0
18/4 - 1.4. D13	1	2	1	3	0	0	0	0	0	0	0	0
18/4 - 1.4. D14	1	2	1	3	0	0	0	0	0	0	0	0
18/4 - 1.4. D15	1	2	1	3	0	0	0	0	0	0	0	0
18/4 - 1.4. D16	1	2	1	3	0	0	0	0	0	0	0	0
18/4 - 1.4. D17	1	2	1	3	0	0	0	0	0	0	0	0
18/4 - 1.4. D18	1	2	1	3	0	0	0	0	0	0	0	0
18/4 - 1.4. D19	1	2	1	3	0	0	0	0	0	0	0	0
18/4 - 1.4. D20	1	2	1	3	0	0	0	0	0	0	0	0
18/4 - 1.4. D21	1	2	1	3	0	0	0	0	0	0	0	0
18/4 - 1.4. D22	1	2	1	3	0	0	0	0	0	0	0	0
20/3 - 1.4. D2	2	2	1	3	0	1	0	1	1	0	3	1	245
20/3 - 1.4. D3	2	2	1	3	0	1	0	1	1	0	3	1	245
20/3 - 1.4. D4	2	2	1	3	0	1	0	1	1	0	3	1	245
20/3 - 1.4. D5	2	2	1	3	0	1	0	1	1	0	3	1	245
20/3 - 1.4. D6	2	2	1	3	0	1	0	1	1	0	3	1	245
20/3 - 1.4. D7	2	2	1	3	0	1	0	1	1	0	3	1	245
20/3 - 1.4. D10	2	2	1	3	0	0	0	0	0	0	0	0
20/3 - 1.4. D14	2	2	1	3	0	0	0	0	0	0	0	0
20/3 - 1.4. D15	2	2	1	3	0	0	0	0	0	0	0	0
20/3 - 1.4. D16	2	2	1	3	0	0	0	0	0	0	0	0
20/3 - 1.4. D17	2	2	1	3	0	0	0	0	0	0	0	0
20/3 - 1.4. D19	2	2	1	3	0	0	0	0	0	0	0	0
20/3 - 1.4. D20	2	2	1	3	0	0	0	0	0	0	0	0
20/3 - 1.4. D21	2	2	1	3	0	0	0	1	1	0	2	0	45
20/3 - 1.4. D22	2	2	1	3	0	0	0	0	0	0	0	0
22/5 - 1.4. D1	2	2	1	3	1	1	0	0	1	0	3	1	125
22/5 - 1.4. D2	2	2	1	3	1	1	0	0	1	0	3	1	125
22/5 - 1.4. D3	2	2	1	3	1	1	0	0	1	0	3	1	125
22/5 - 1.4. D6	2	2	1	3	0	1	0	1	1	0	3	1	245
22/5 - 1.4. D7	2	2	1	3	0	1	0	1	1	0	3	1	245
22/5 - 1.4. D8	2	2	1	3	0	1	0	1	1	0	3	1	245
22/5 - 1.4. D9	2	2	1	3	1	1	0	0	1	0	3	1	125
22/5 - 1.4. D10	2	2	1	3	1	1	0	0	1	0	3	1	125
22/5 - 1.4. D11	2	2	1	3	0	0	0	0	0	0	0	0
22/5 - 1.4. D12	2	2	1	3	0	1	0	1	1	0	3	1	245
22/5 - 1.4. D16	2	2	1	3	0	1	0	1	1	0	3	1	245
22/5 - 1.4. D17	2	2	1	3	0	0	0	1	1	0	2	0	45
20/1 - 1.4. D8	1	2	1	3	0	0	0	0	0	0	0	0
20/1 - 1.4. D11	1	2	1	3	0	0	0	0	0	0	0	0
20/1 - 1.4. D12	1	2	1	3	0	0	0	0	0	0	0	0
20/1 - 1.4. D13	1	2	1	3	0	0	0	0	0	0	0	0
20/1 - 1.4. D14	1	2	1	3	0	1	0	0	0	0	1	0	2
20/1 - 1.4. D15	1	2	1	3	0	0	0	0	0	0	0	0
20/1 - 1.4. D16	1	2	1	3	0	0	0	0	0	0	0	0
20/1 - 1.4. D17	1	2	1	3	0	0	0	0	0	0	0	0
20/1 - 1.4. D18	1	2	1	3	0	0	0	0	0	0	0	0
20/1 - 1.4. D19	1	2	1	3	0	0	0	0	0	0	0	0
20/1 - 1.4. D20	1	2	1	3	0	0	0	0	0	0	0	0
20/1 - 1.4. D21	1	2	1	3	0	0	0	0	0	0	0	0
20/1 - 1.4. D22	1	2	1	3	0	0	0	0	0	0	0	0
23/8 - 1.4. D4	2	2	1	3	0	0	0	0	0	0	0	0
23/8 - 1.4. D8	2	2	1	3	0	0	0	0	0	0	0	0
23/8 - 1.4. D9	2	2	1	3	0	0	0	0	0	0	0	0
23/8 - 1.4. D10	2	2	1	3	0	0	0	0	0	0	0	0
23/8 - 1.4. D11	2	2	1	3	0	0	0	0	0	0	0	0
23/8 - 1.4. D13	2	2	1	3	0	0	0	0	0	0	0	0
23/8 - 1.4. D14	2	2	1	3	0	0	0	0	0	0	0	0
23/8 - 1.4. D15	2	2	1	3	0	0	0	0	0	0	0	0
[truncated: 740 more rows]
